# Supplementary material for: A mini-library system to investigate non-essential residues of lipid-phosphatidylserine (PS) binding peptide–peptoid hybrid PPS1
Source: Royal Society of Chemistry journal article supplement (doi:10.1039/c7md00372b), 2017-01-01
Supplement: c7md00372b1.pdf [file c7md00372b1.pdf]

## Supporting Information

### A mini-library system to investigate non-essential residues of lipid-phosphatidylserine (PS) binding peptide-peptoid hybrid PPS1

Satya Prakash Shukla <sup>a</sup>, D. Gomika Udugamasooriya <sup>a, b, \*</sup>

<sup>a</sup>*Department of Pharmacological & Pharmaceutical Sciences, University of Houston, 3455 Cullen Blvd., Houston, TX 77204-5037, USA*

<sup>b</sup>*Department of Cancer Systems Imaging, MD Anderson Cancer Center, 1881 East Road, Houston, TX 77030-4009, USA*

\*Corresponding Author.

Email Address: gomika@uh.edu (D. G. Udugamasooriya)

#### Table of Contents

| S. No. | Content                                                                    | Page No. |
|--------|----------------------------------------------------------------------------|----------|
| 1      | Structure and Mass spectra of crude Compound 1-39                          | 2-40     |
| 2      | Structure, Mass spectra of crude PPS1D1, pure PPS1D1 and Analytical HPLC   | 41-42    |
| 3      | Structure, Mass spectra of crude PC462D1, pure PC462D1 and Analytical HPLC | 43-44    |
| 4      | Structure, Mass spectra and Analytical HPLC of PPS1D1-M                    | 45       |
| 5      | Mass spectra and Analytical HPLC of pure Compound 1                        | 46       |
| 6      | Mass spectra and Analytical HPLC of pure Compound 3                        | 47       |
| 7      | Mass spectra and Analytical HPLC of pure Compound 6                        | 48       |
| 8      | Mass spectra and Analytical HPLC of pure Compound 11                       | 49       |
| 9      | Mass spectra and Analytical HPLC of pure Compound 12                       | 50       |
| 10     | Mass spectra and Analytical HPLC of pure Compound 24                       | 51       |
| 11     | Mass spectra and Analytical HPLC of pure Compound 32                       | 52       |
| 12     | Mass spectra and Analytical HPLC of pure Compound 34                       | 53       |
| 13     | Mass spectra and Analytical HPLC of pure Compound 37                       | 54       |

(A)

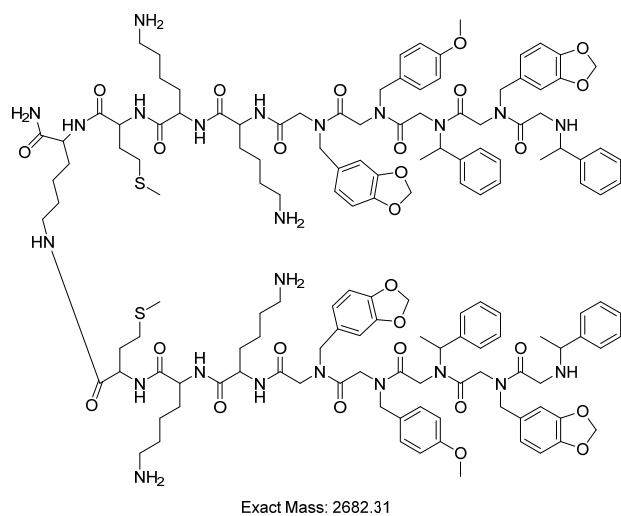

(B)

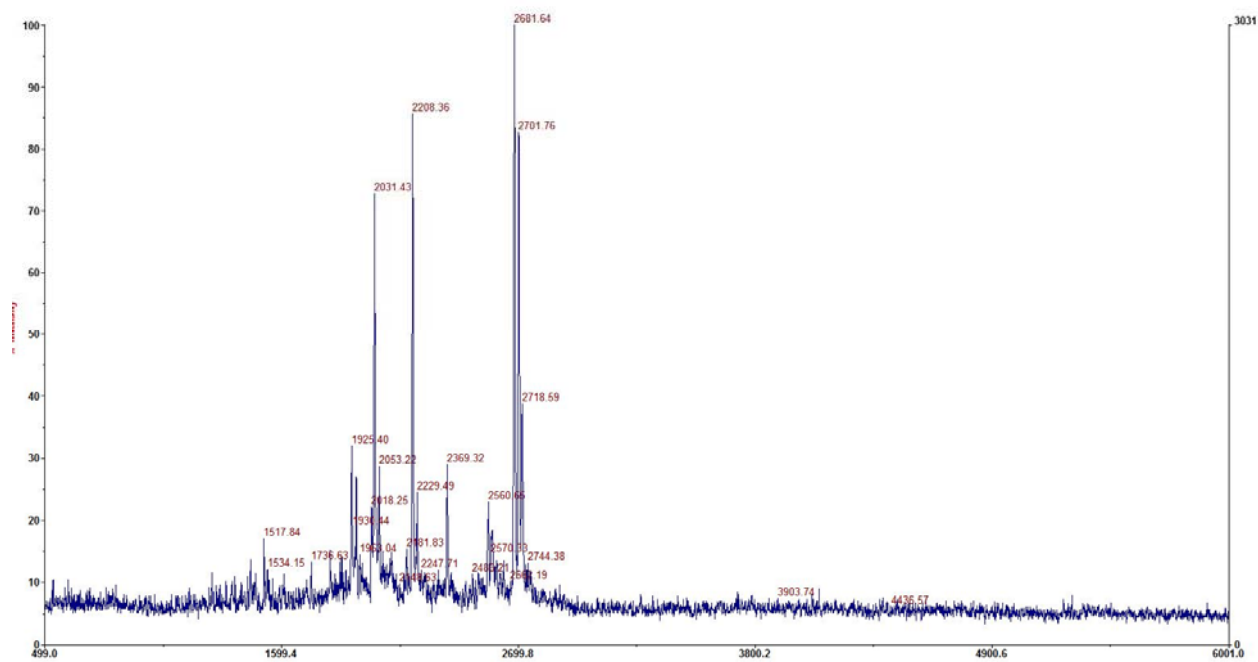

**Figure S1:** (A) Chemical structure of Compound 1, (B) MALDI-TOF spectrum of crude Compound 1.

(A)

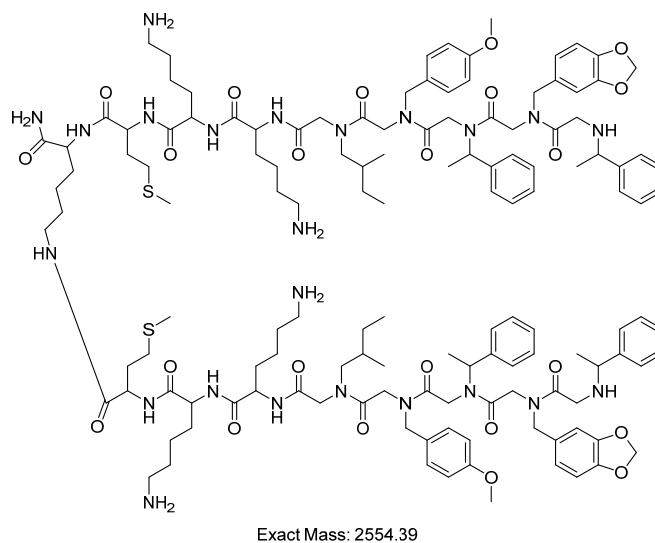

(B)

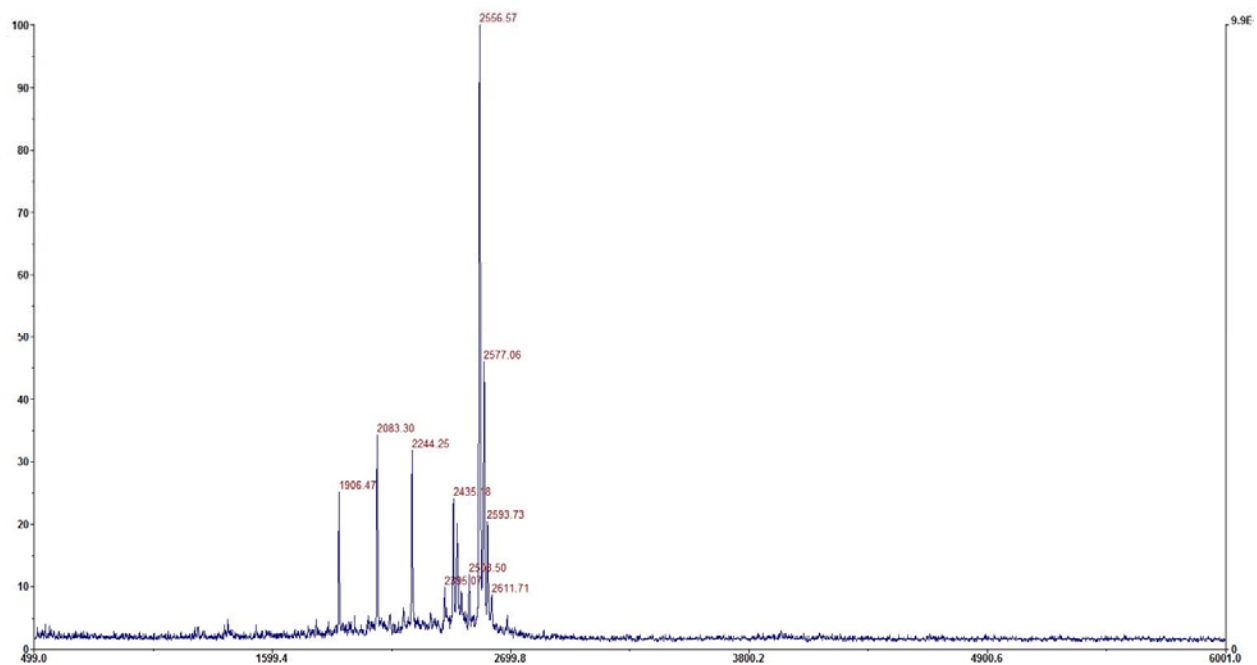

**Figure S2:** (A) Chemical structure of Compound 2, (B) MALDI-TOF spectrum of crude Compound 2.

(A)

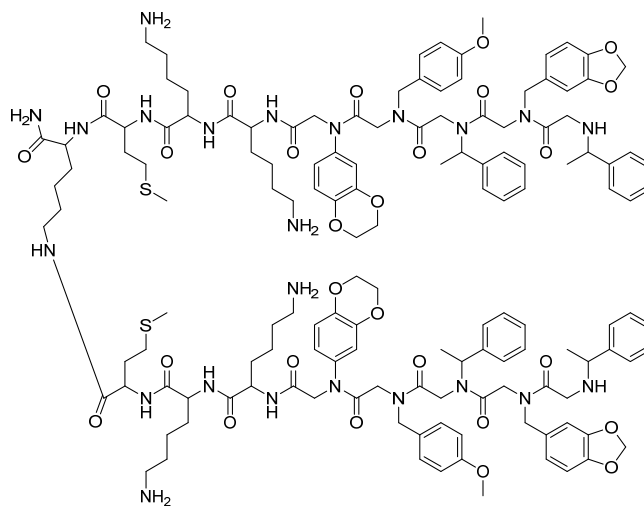

Exact Mass: 2682.31

(B)

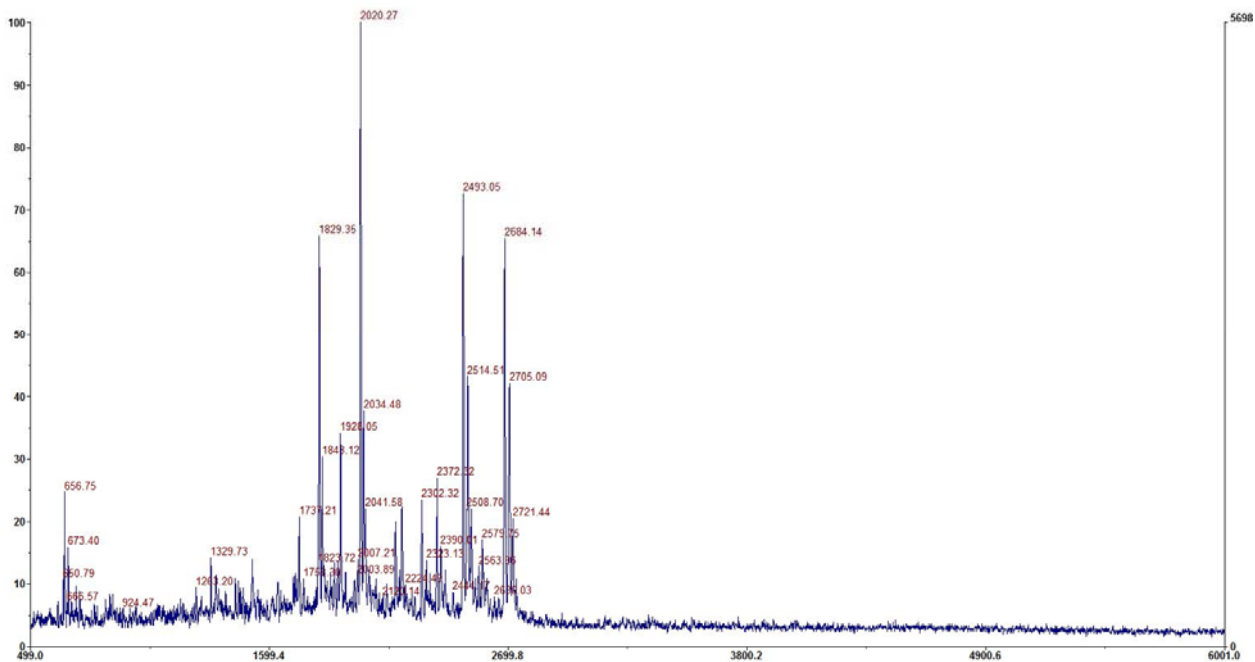

**Figure S3:** (A) Chemical structure of Compound 3, (B) MALDI-TOF spectrum of crude Compound 3.

(A)

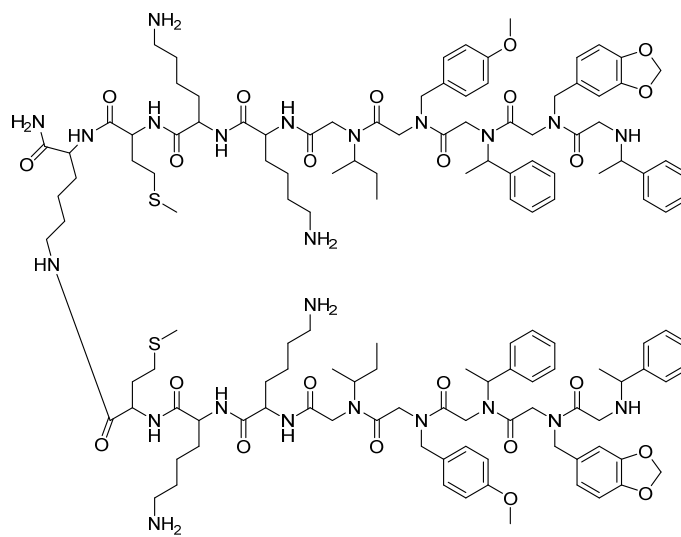

Exact Mass: 2526.36

(B)

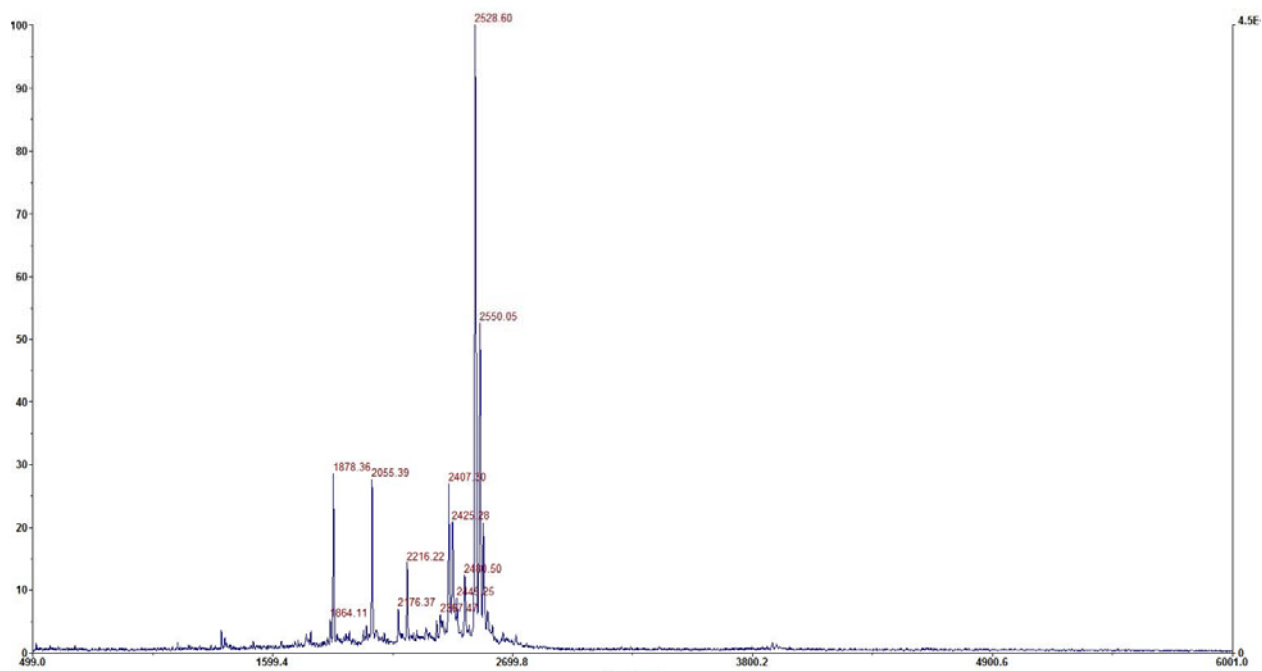

**Figure S4:** (A) Chemical structure of Compound 4, (B) MALDI-TOF spectrum of crude Compound 4.

(A)

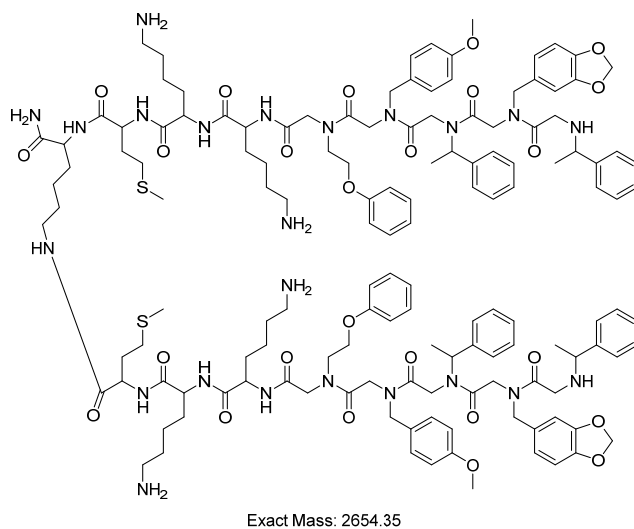

(B)

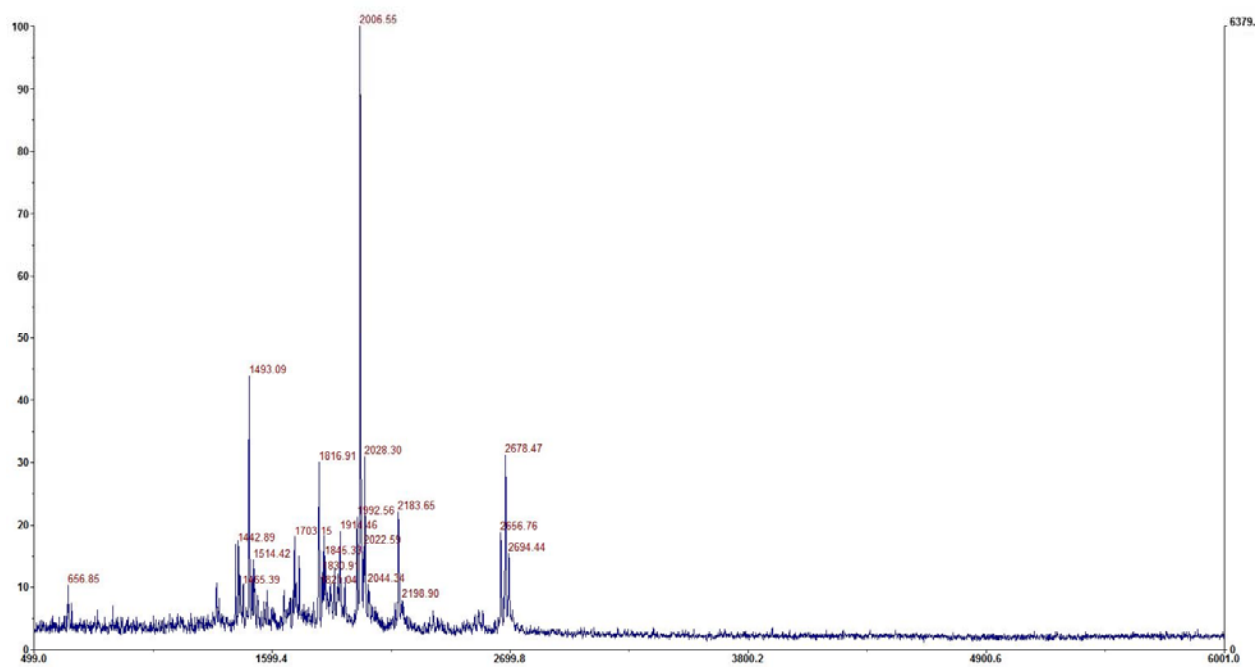

**Figure S5:** (A) Chemical structure of Compound 5, (B) MALDI-TOF spectrum of crude Compound 5.

(A)

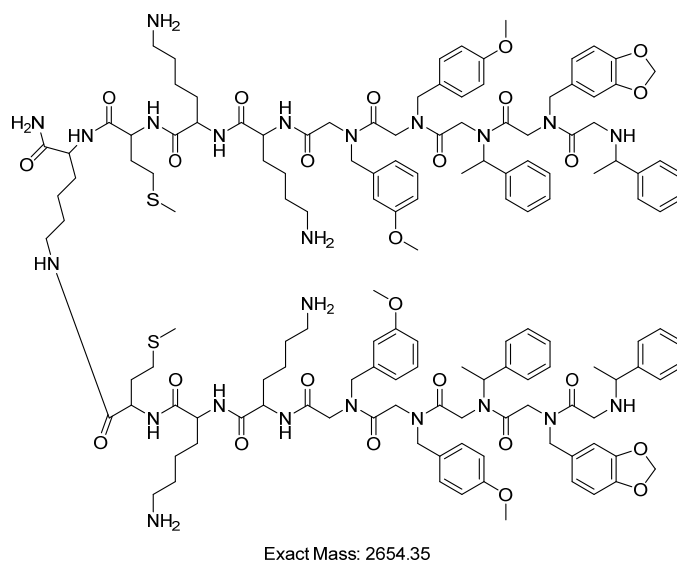

(B)

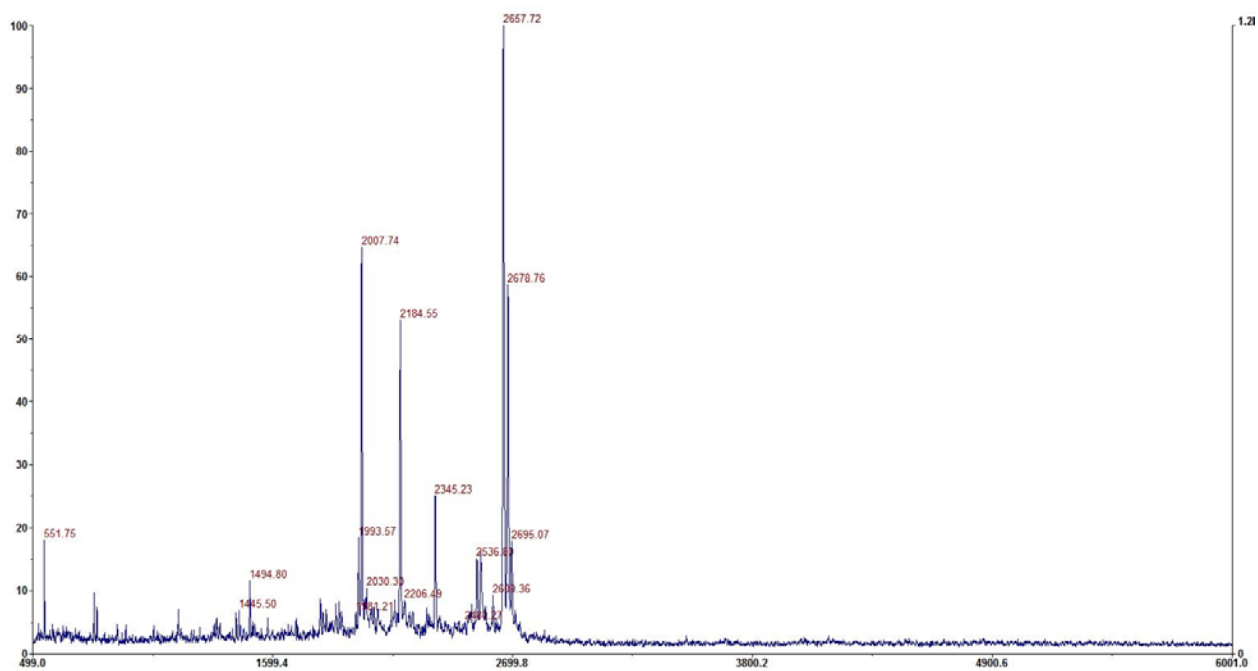

**Figure S6:** (A) Chemical structure of Compound 6, (B) MALDI-TOF spectrum of crude Compound 6.





(A)

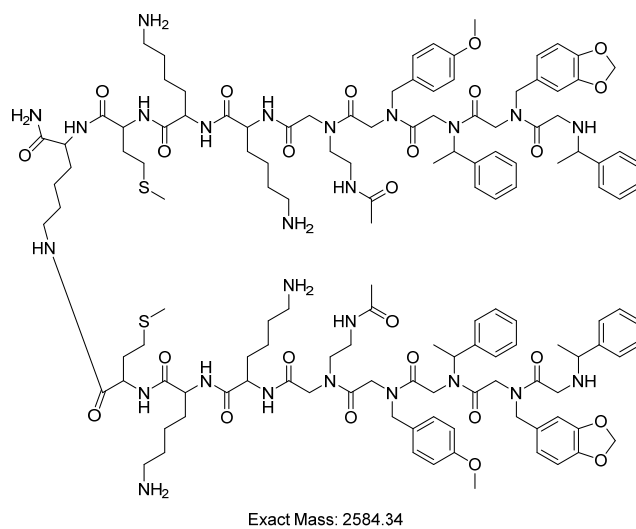

(B)

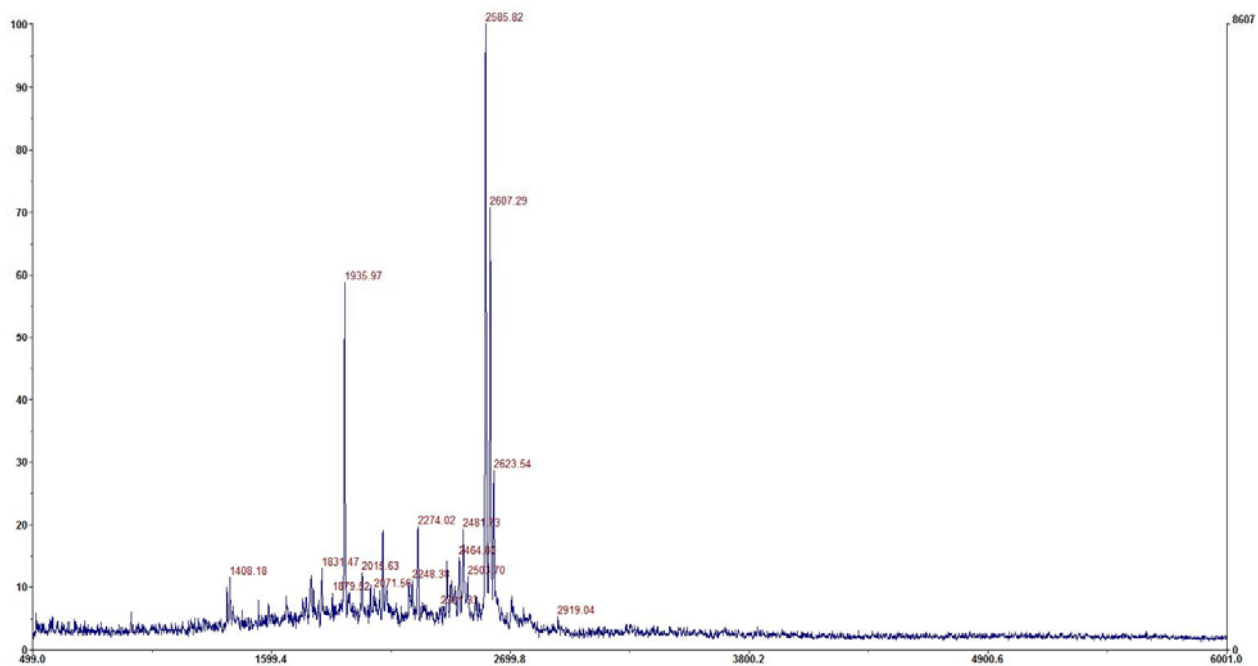

**Figure S8:** (A) Chemical structure of Compound 8, (B) MALDI-TOF spectrum of crude Compound 8.



(A)

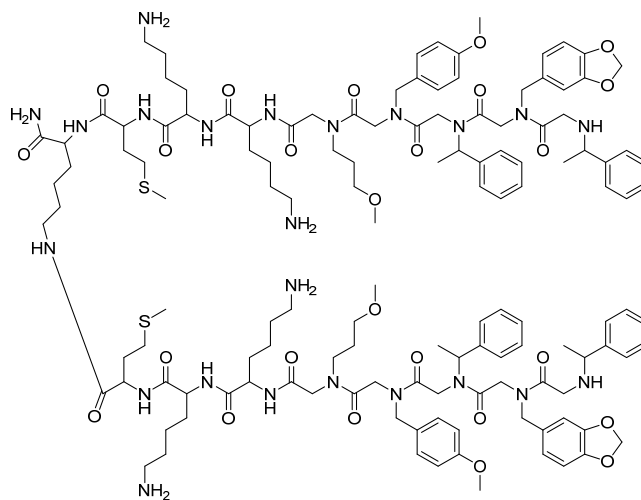

Exact Mass: 2558.35

(B)

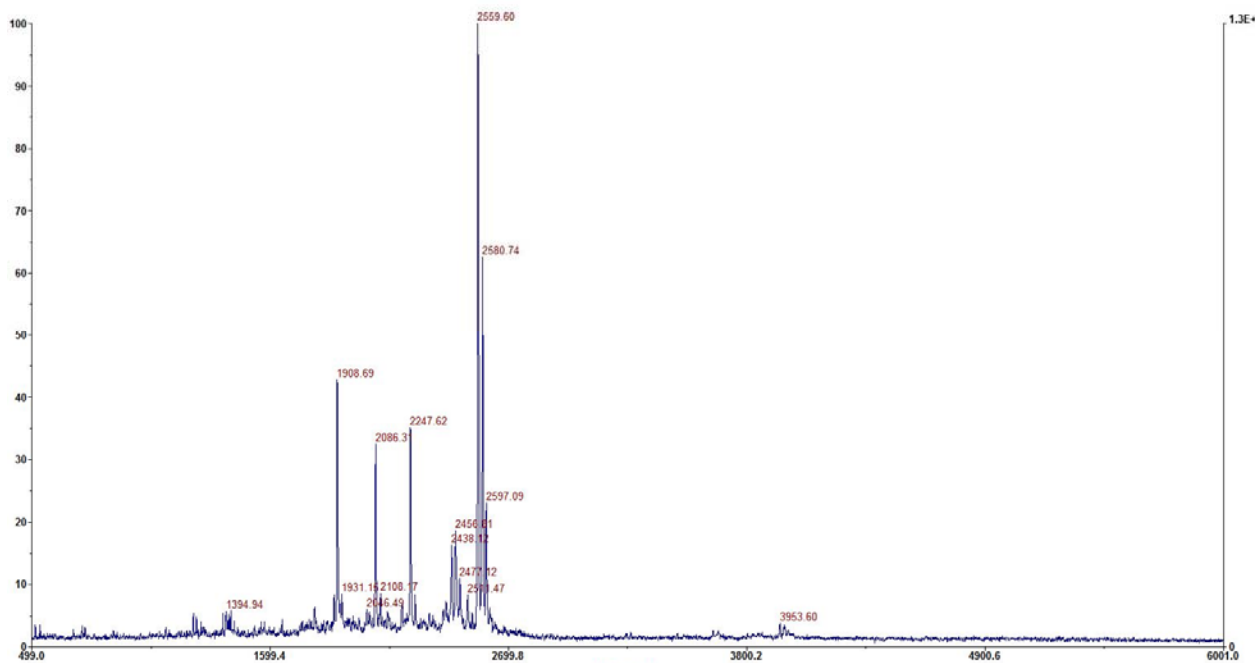

**Figure S10:** (A) Chemical structure of Compound 10, (B) MALDI-TOF spectrum of crude Compound 10.

(A)

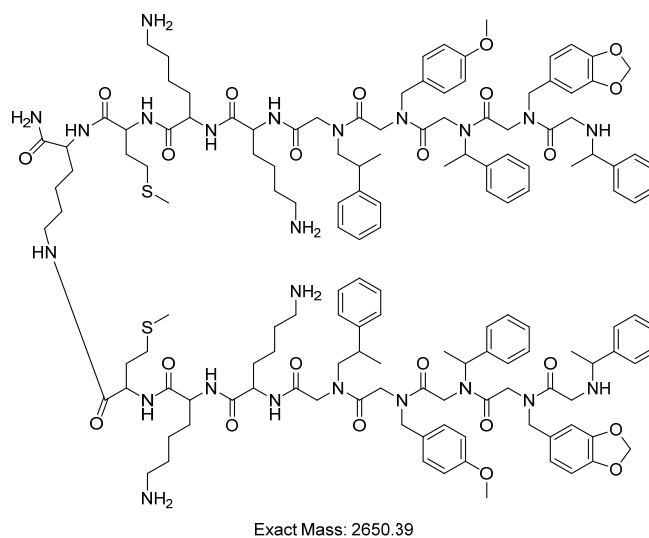

(B)

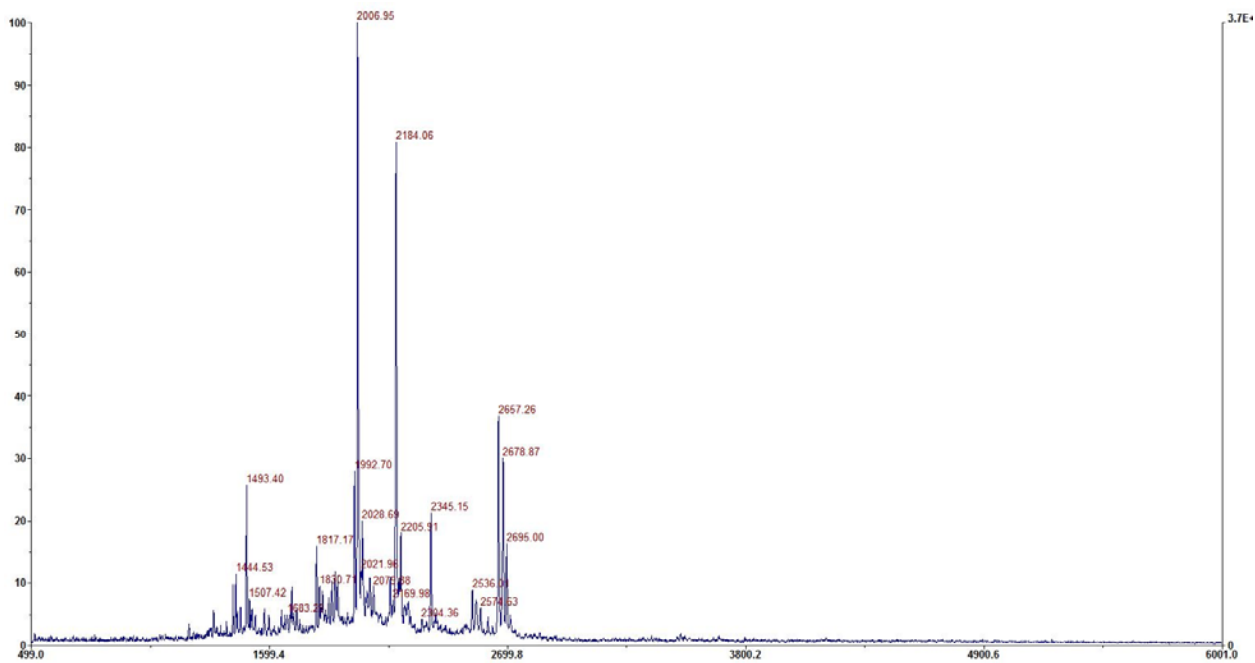

**Figure S11:** (A) Chemical structure of Compound 11, (B) MALDI-TOF spectrum of crude Compound 11.



(A)

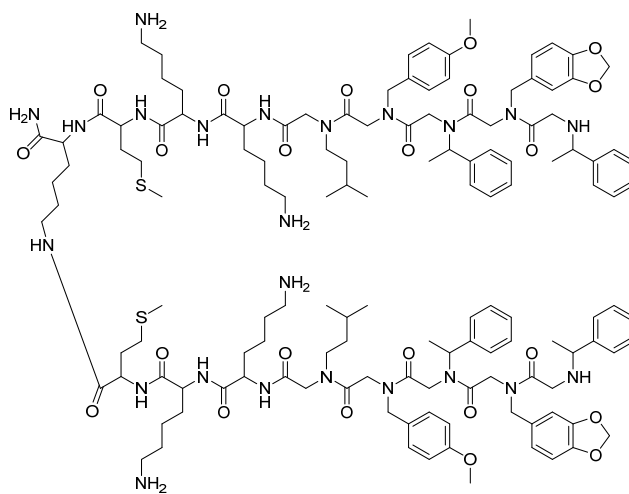

Exact Mass: 2554.39

(B)

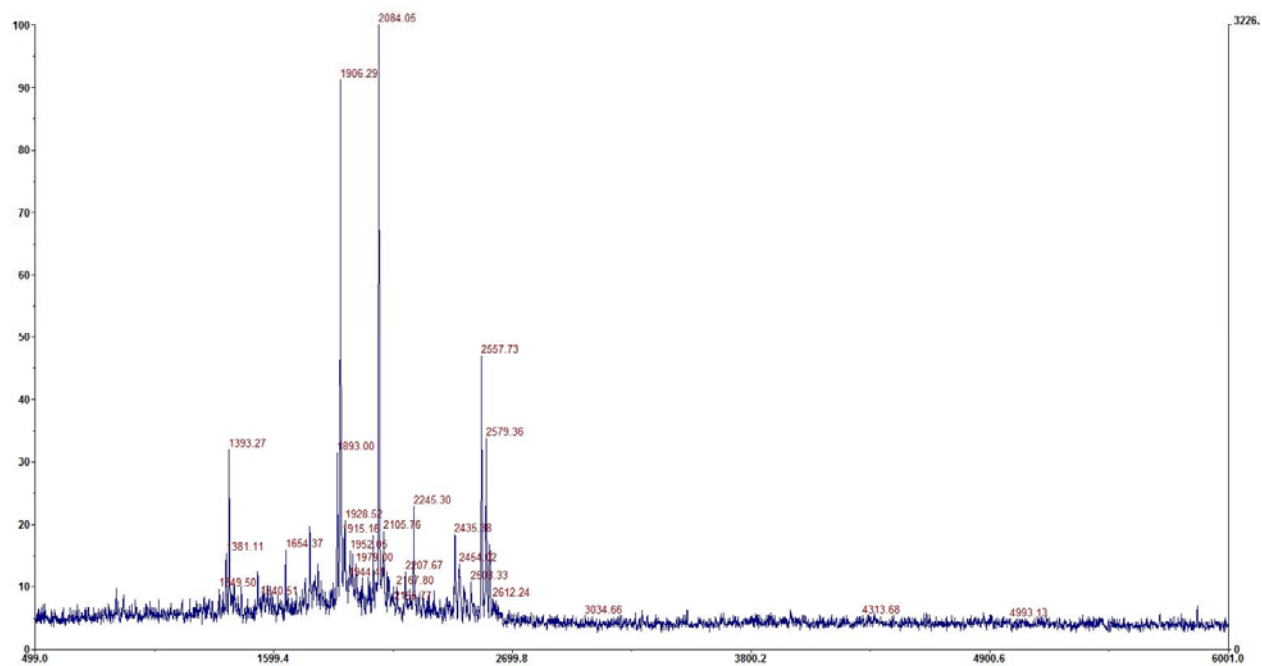

**Figure S13:** (A) Chemical structure of Compound 13, (B) MALDI-TOF spectrum of crude Compound 13.



(A)

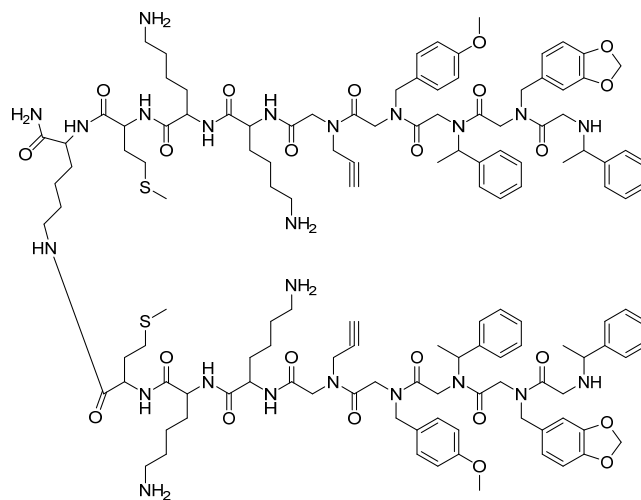

Exact Mass: 2490.27

(B)

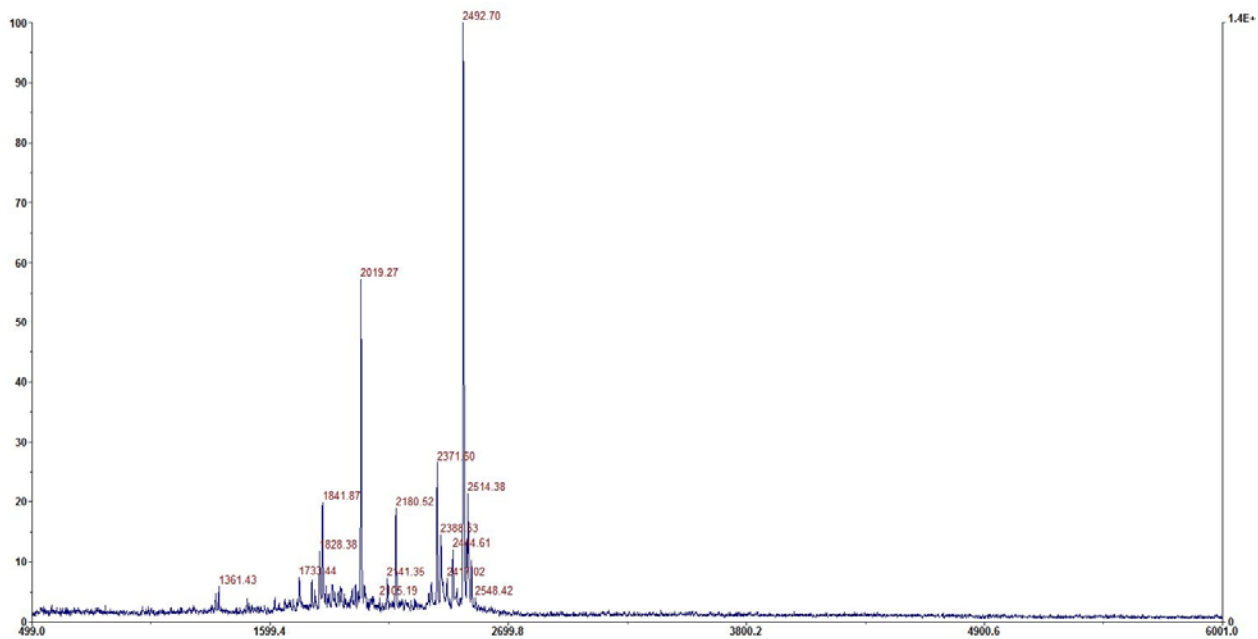

**Figure S15:** (A) Chemical structure of Compound 15, (B) MALDI-TOF spectrum of crude Compound 15.





(A)

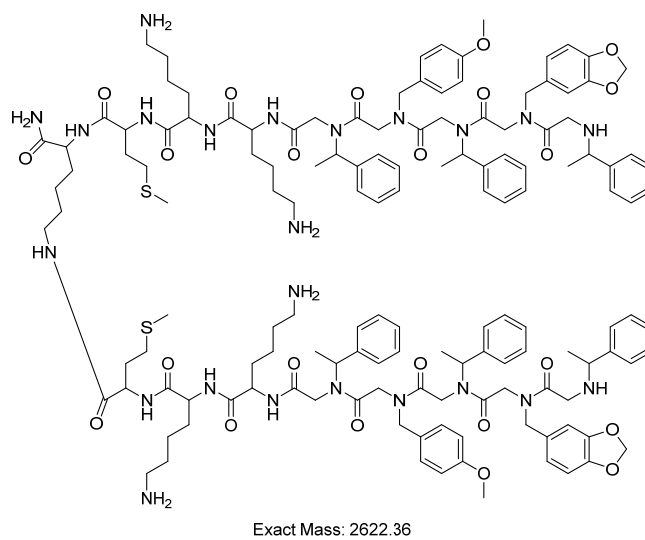

(B)

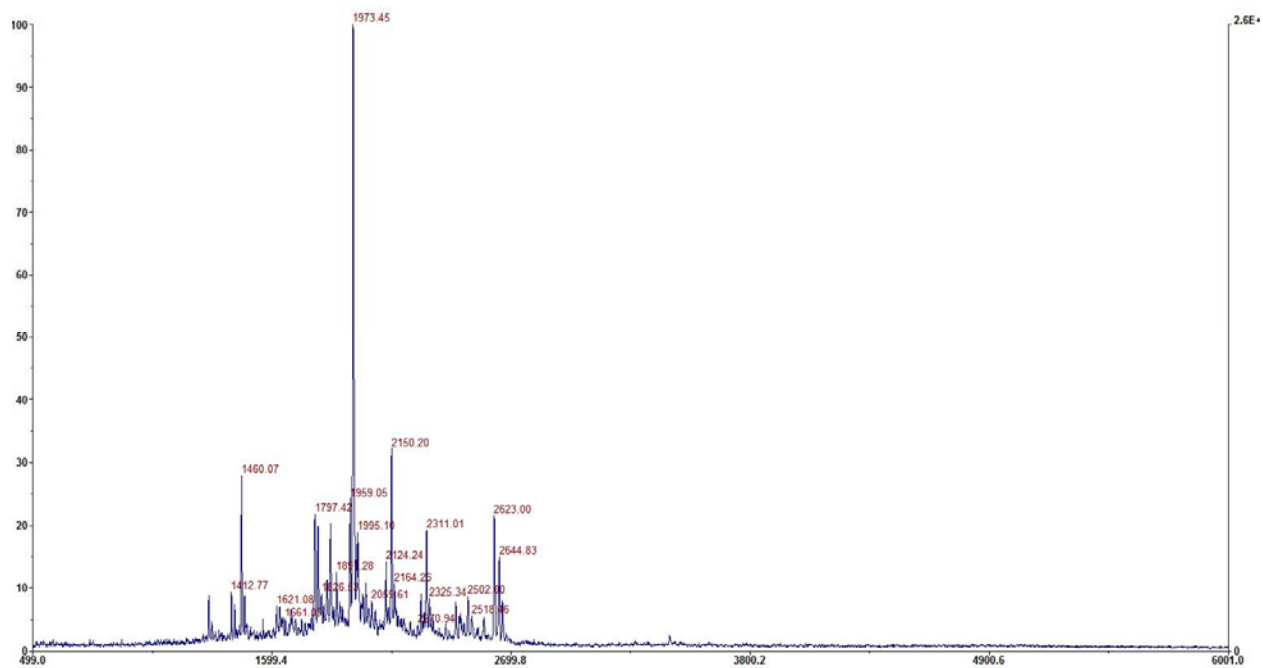

**Figure S17:** (A) Chemical structure of Compound 17, (B) MALDI-TOF spectrum of crude Compound 17.

(A)

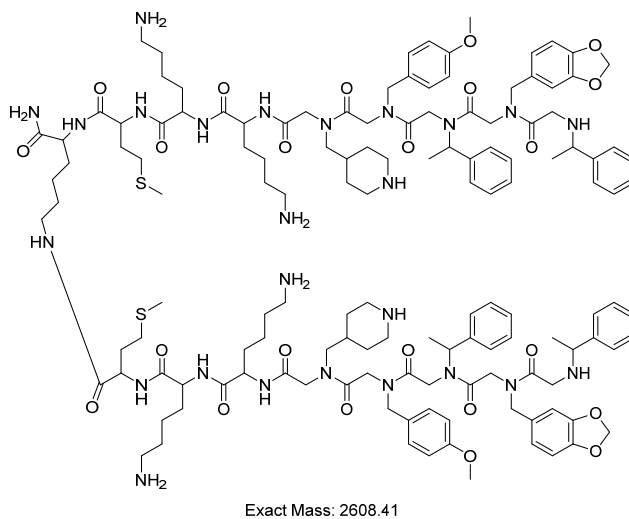

(B)

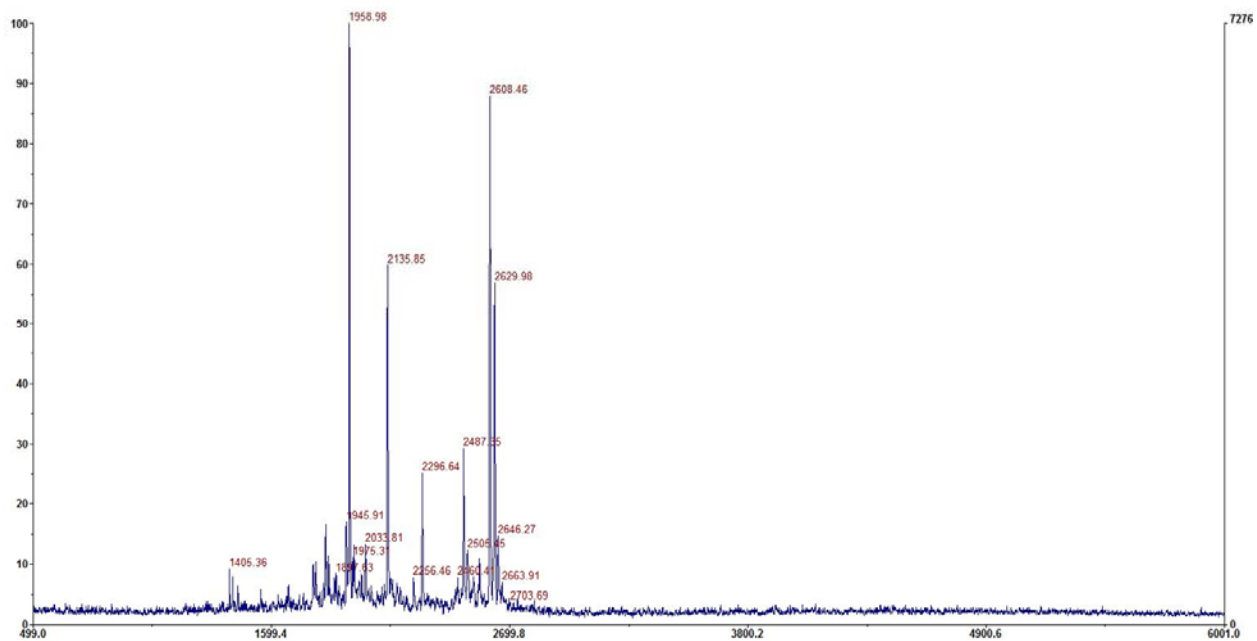

**Figure S18:** (A) Chemical structure of Compound 18, (B) MALDI-TOF spectrum of crude Compound 18.

(A)

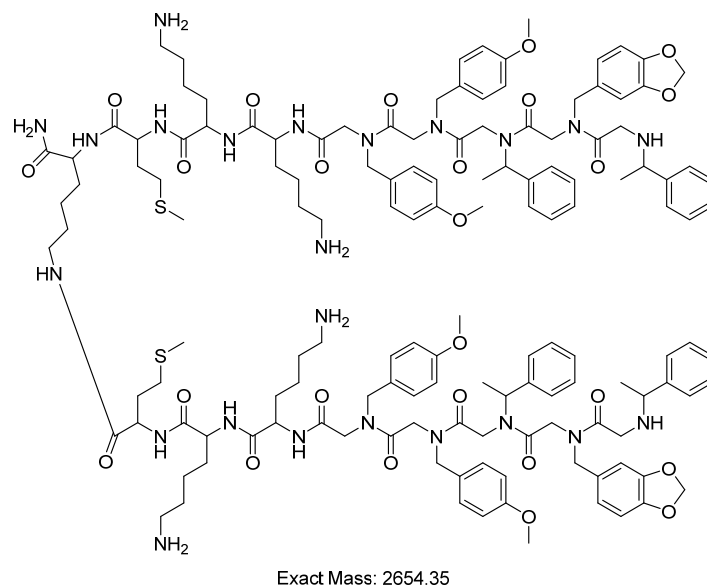

(B)

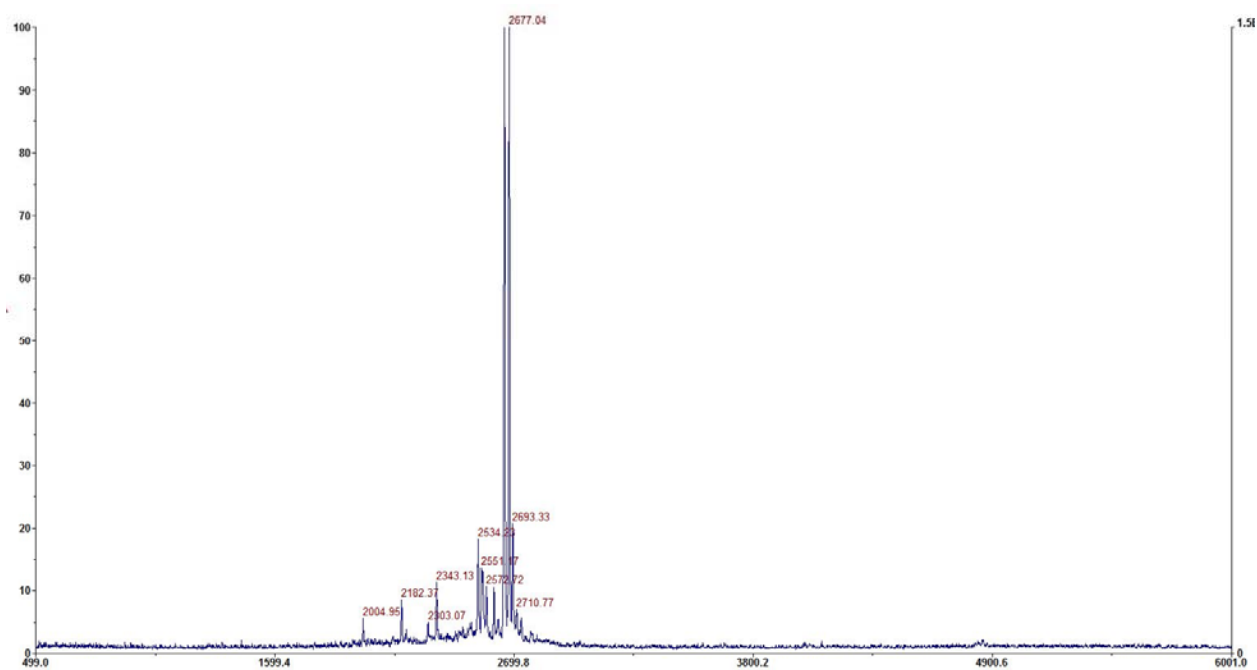

**Figure S19:** (A) Chemical structure of Compound 19, (B) MALDI-TOF spectrum of crude Compound 19.

(A)

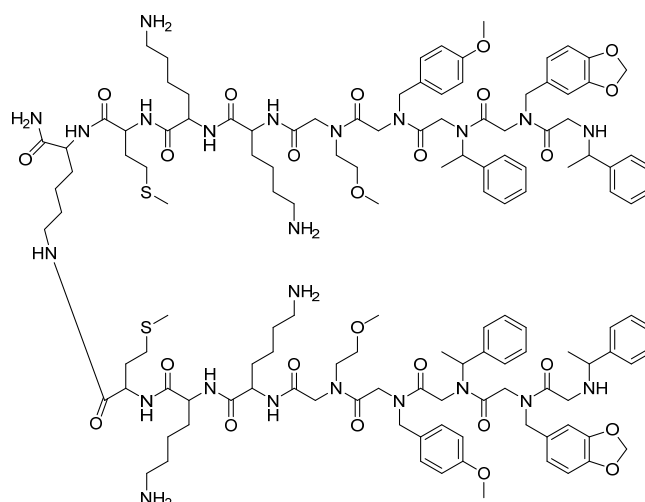

Exact Mass: 2530.32

(B)

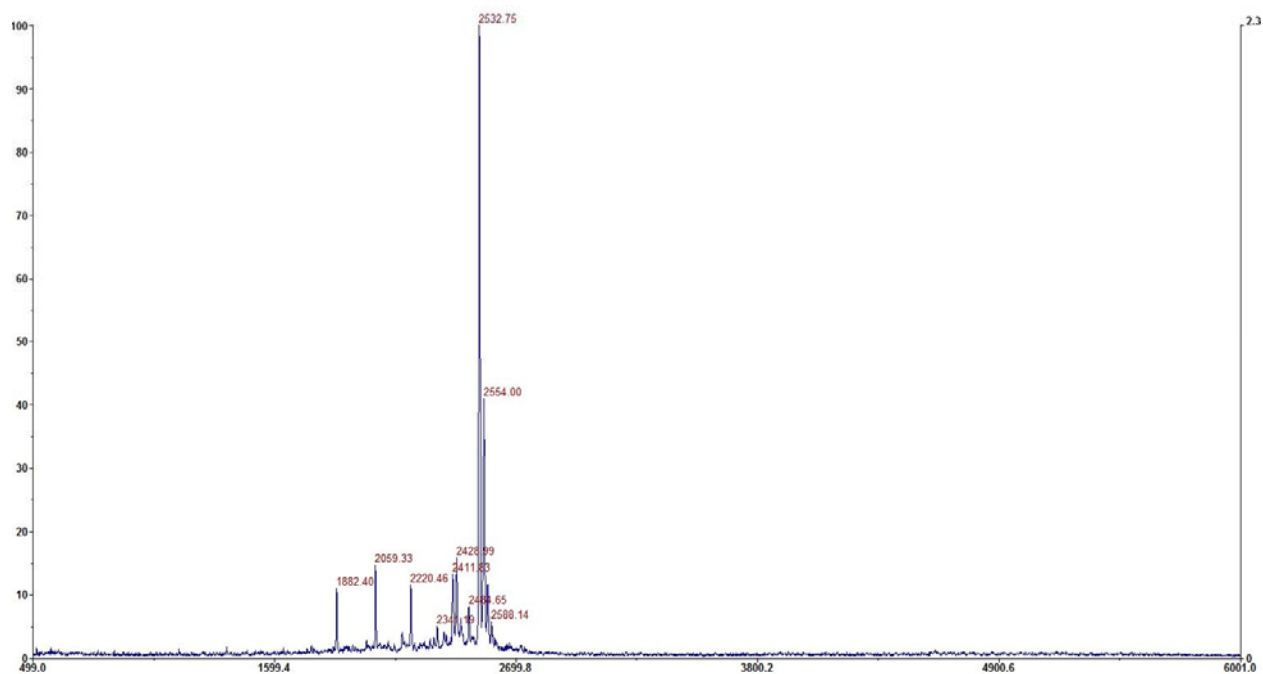

**Figure S20:** (A) Chemical structure of Compound 20, (B) MALDI-TOF spectrum of crude Compound 20.

(A)

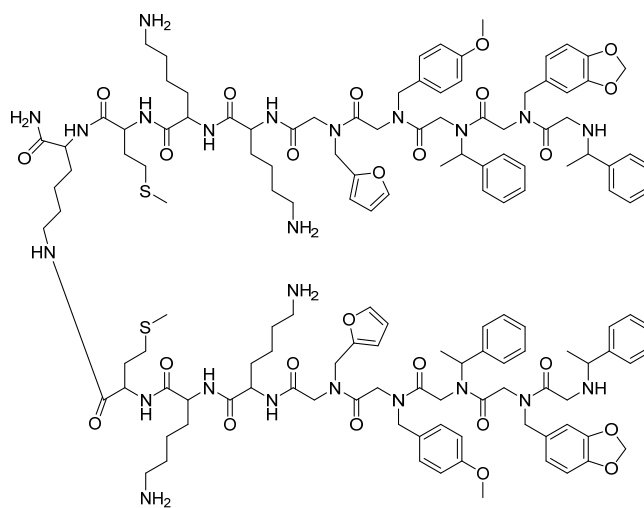

Exact Mass: 2574.29

(B)

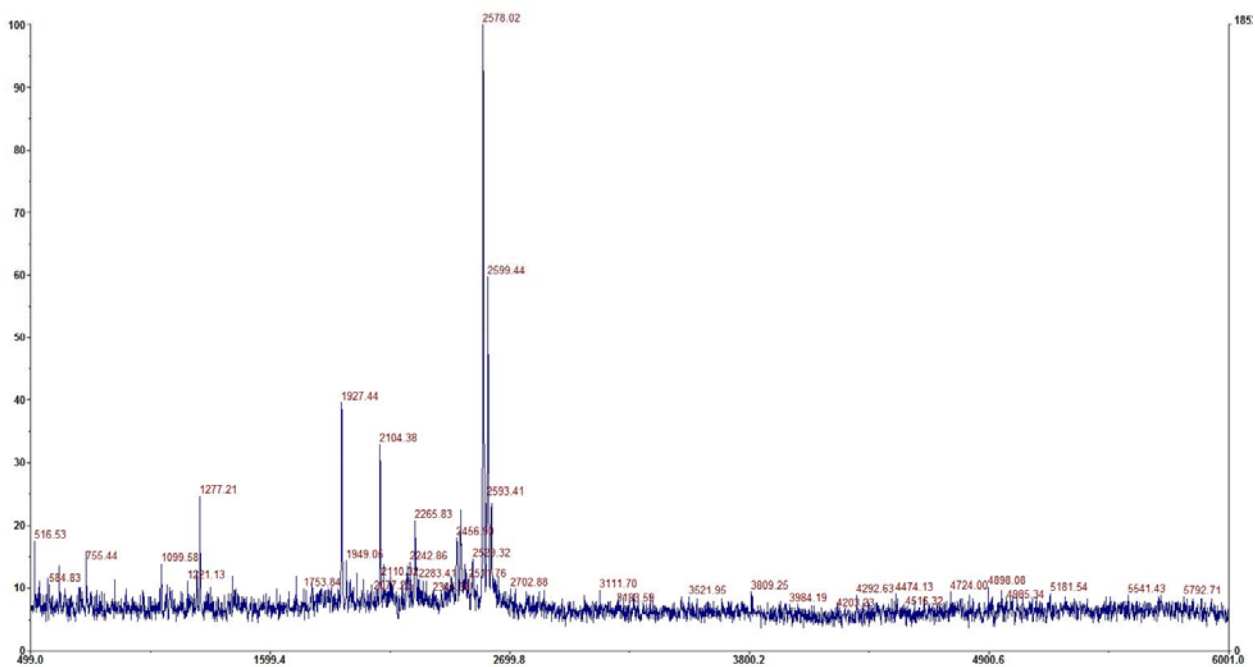

**Figure S21:** (A) Chemical structure of Compound 21, (B) MALDI-TOF spectrum of crude Compound 21.

(A)

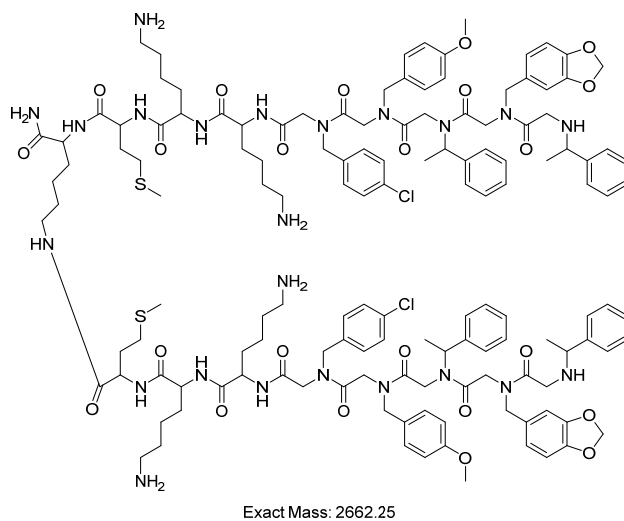

(B)

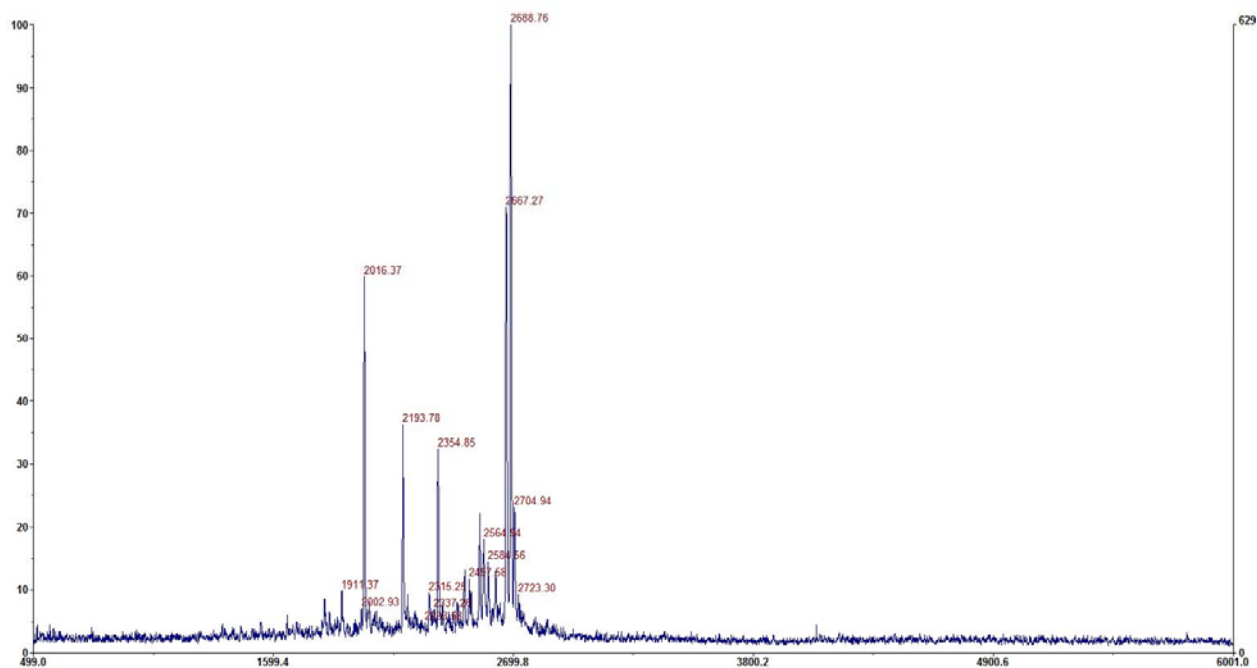

**Figure S22:** (A) Chemical structure of Compound 22, (B) MALDI-TOF spectrum of crude Compound 22.

(A)

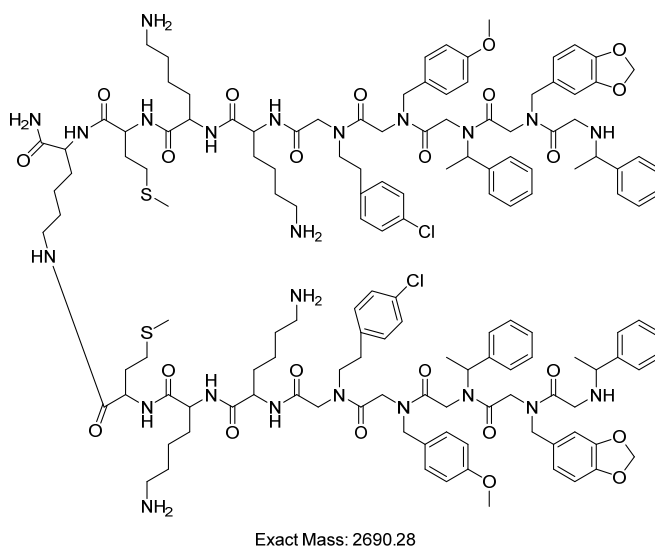

(B)

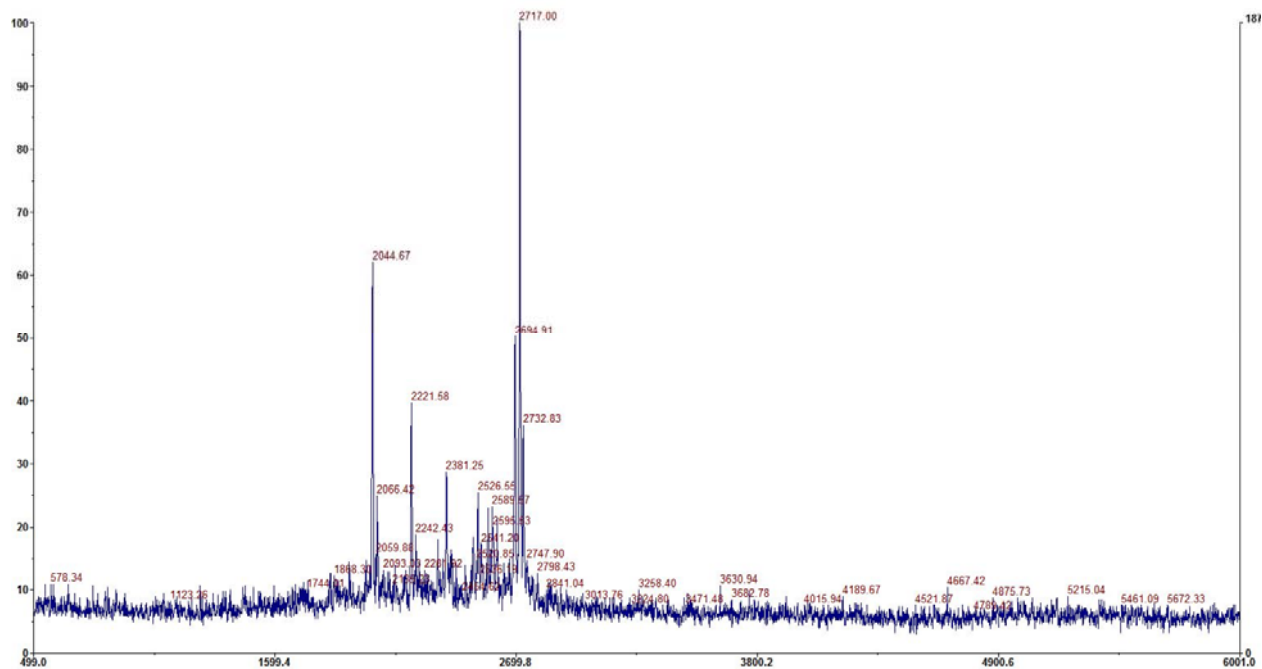

**Figure S23:** (A) Chemical structure of Compound 23, (B) MALDI-TOF spectrum of crude Compound 23.





(A)

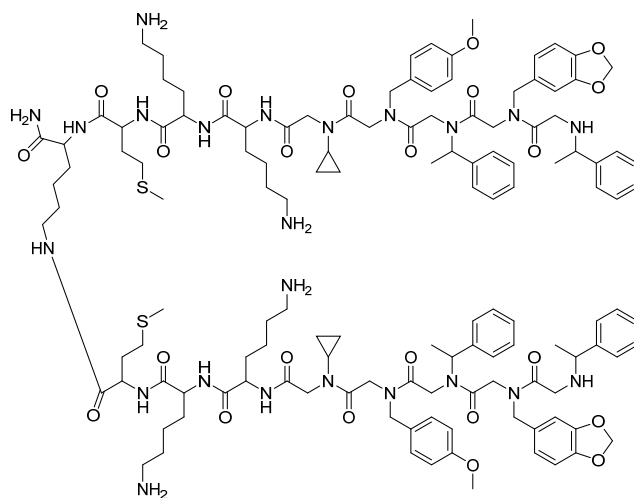

Exact Mass: 2494.30

(B)

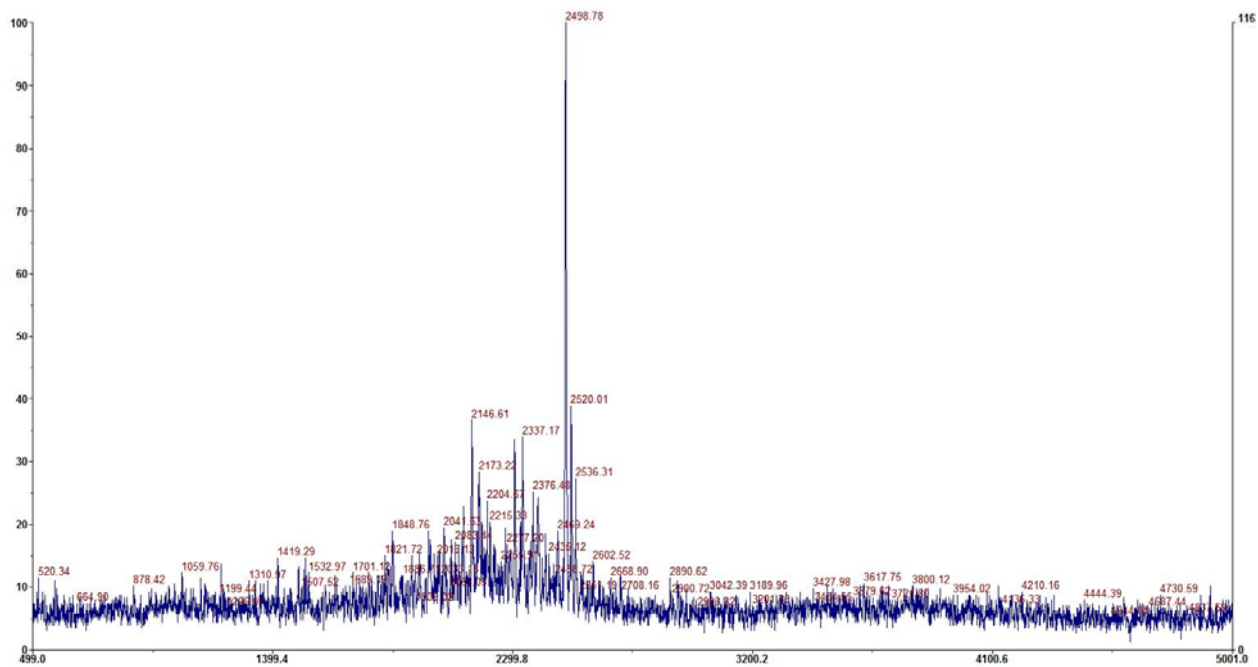

**Figure S25:** (A) Chemical structure of Compound 25, (B) MALDI-TOF spectrum of crude Compound 25.

(A)

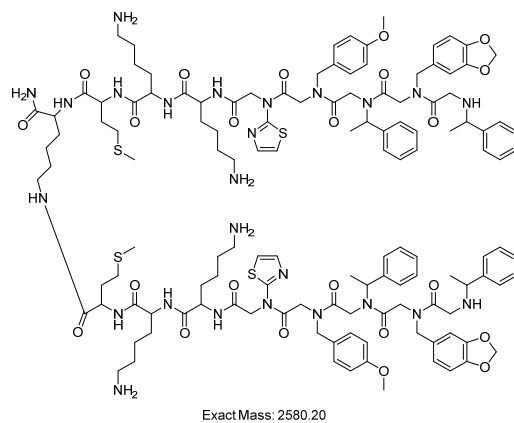

(B)

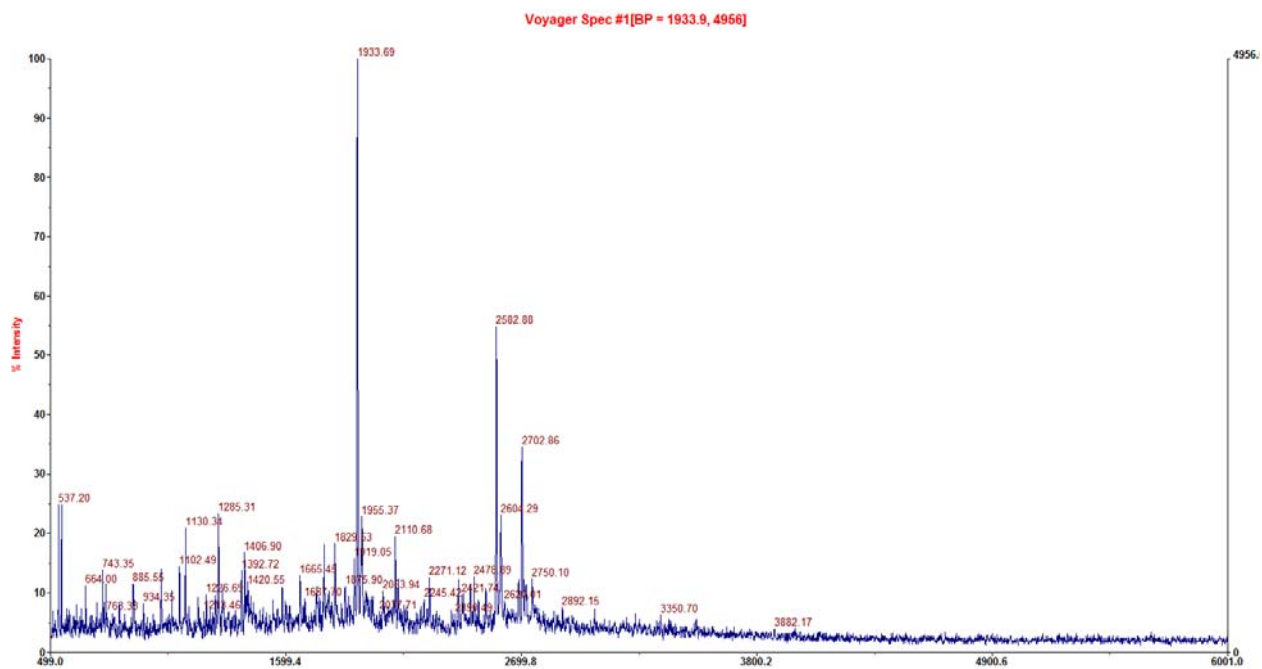

**Figure S26:** (A) Chemical structure of Compound 26, (B) MALDI-TOF spectrum of crude Compound 26.

(A)

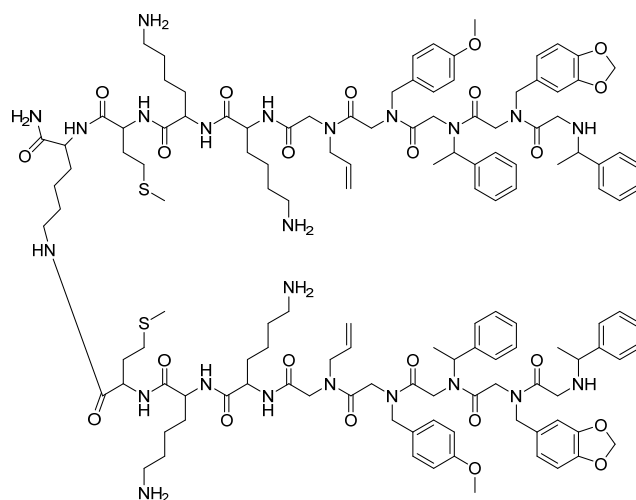

Exact Mass: 2494.30

(B)

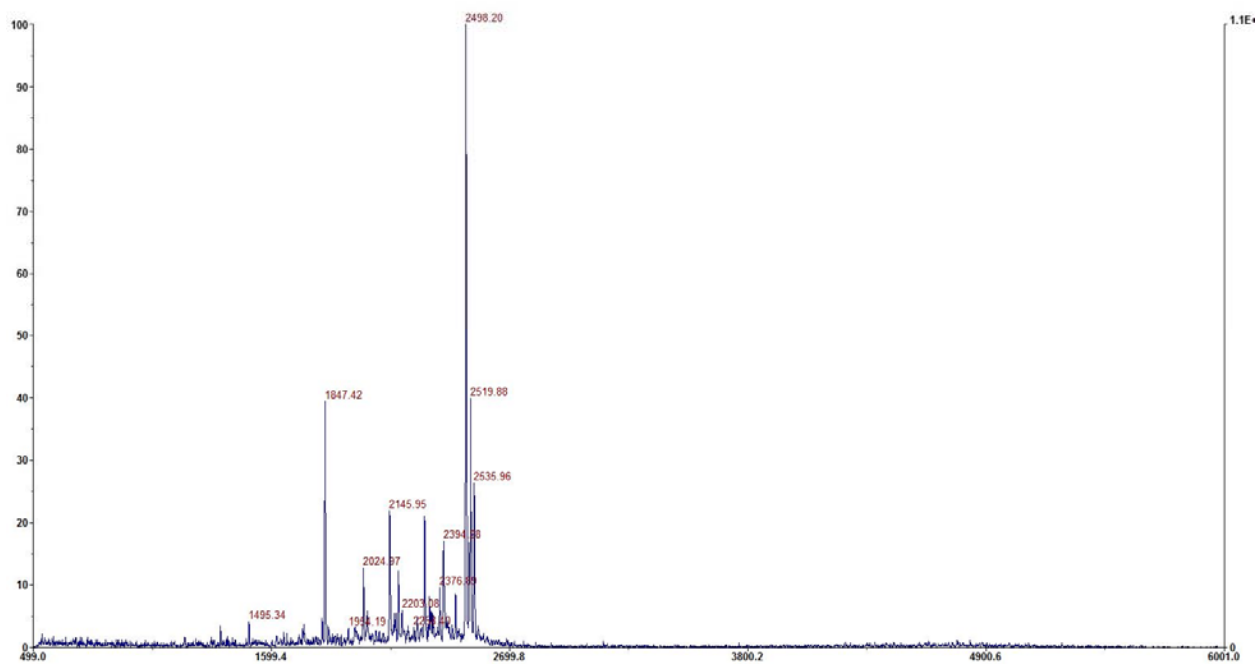

**Figure S27:** (A) Chemical structure of Compound 27, (B) MALDI-TOF spectrum of crude Compound 27.





(A)

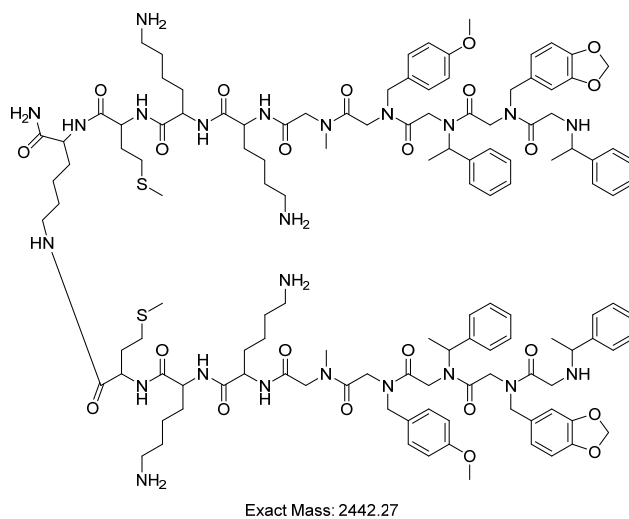

(B)

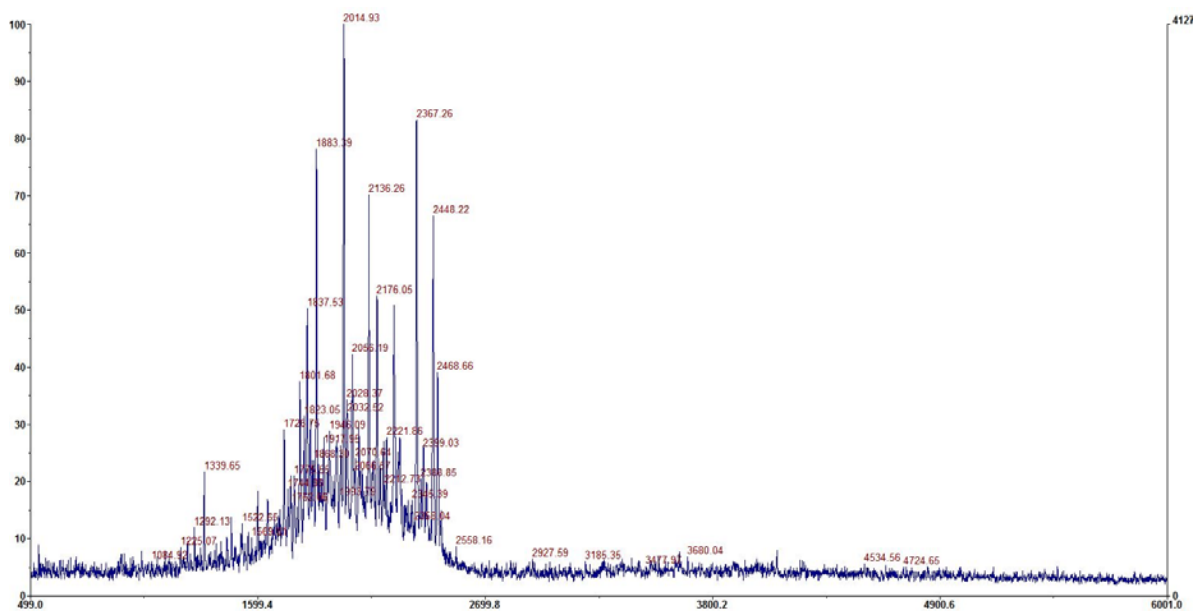

**Figure S30:** (A) Chemical structure of Compound 30, (B) MALDI-TOF spectrum of crude Compound 30.

(A)

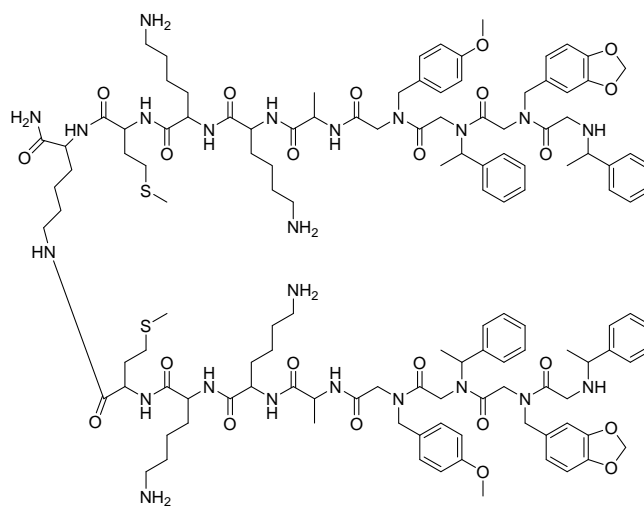

Exact Mass: 2442.27

(B)

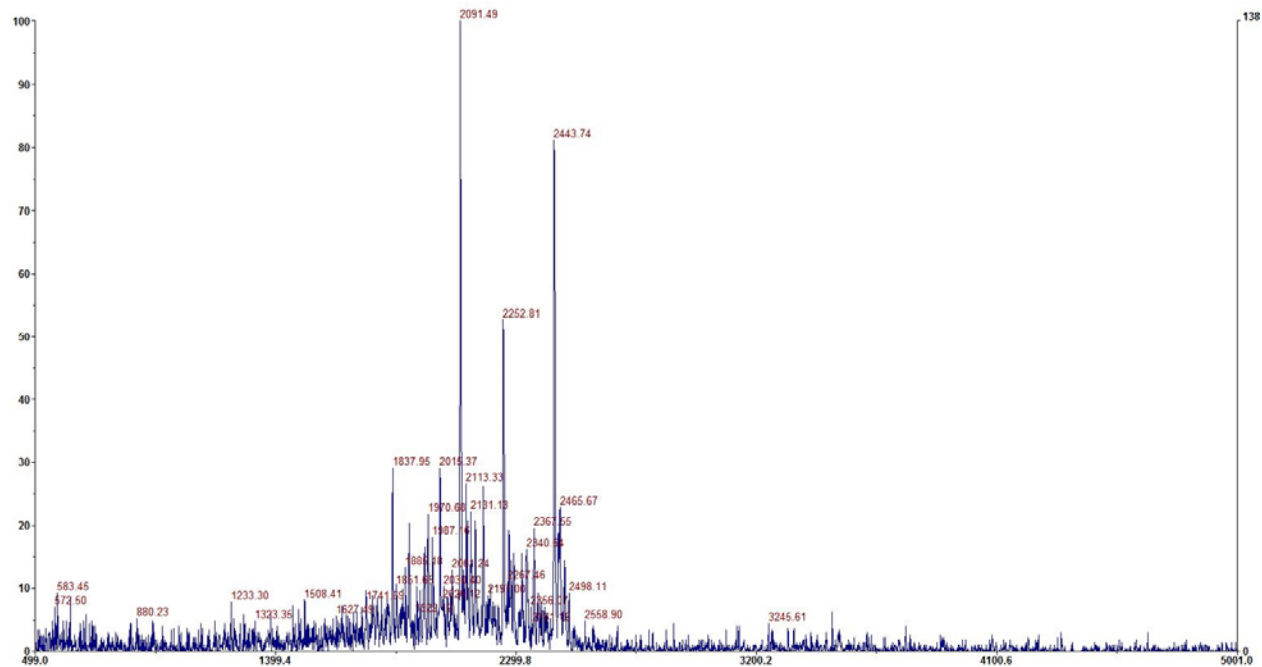

**Figure S31:** (A) Chemical structure of Compound 31, (B) MALDI-TOF spectrum of crude Compound 31.



(A)

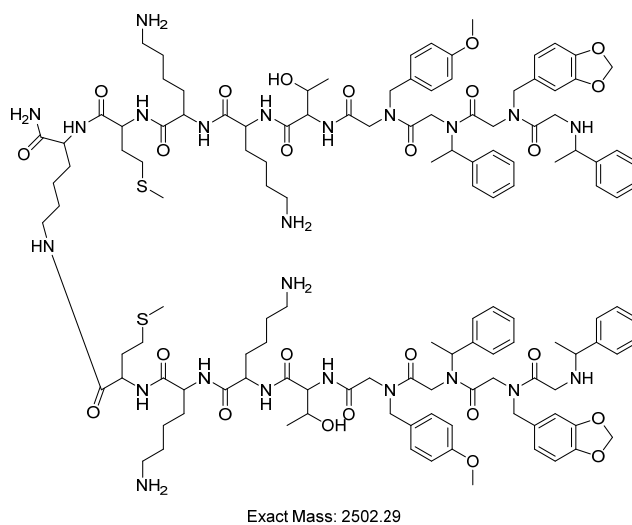

(B)

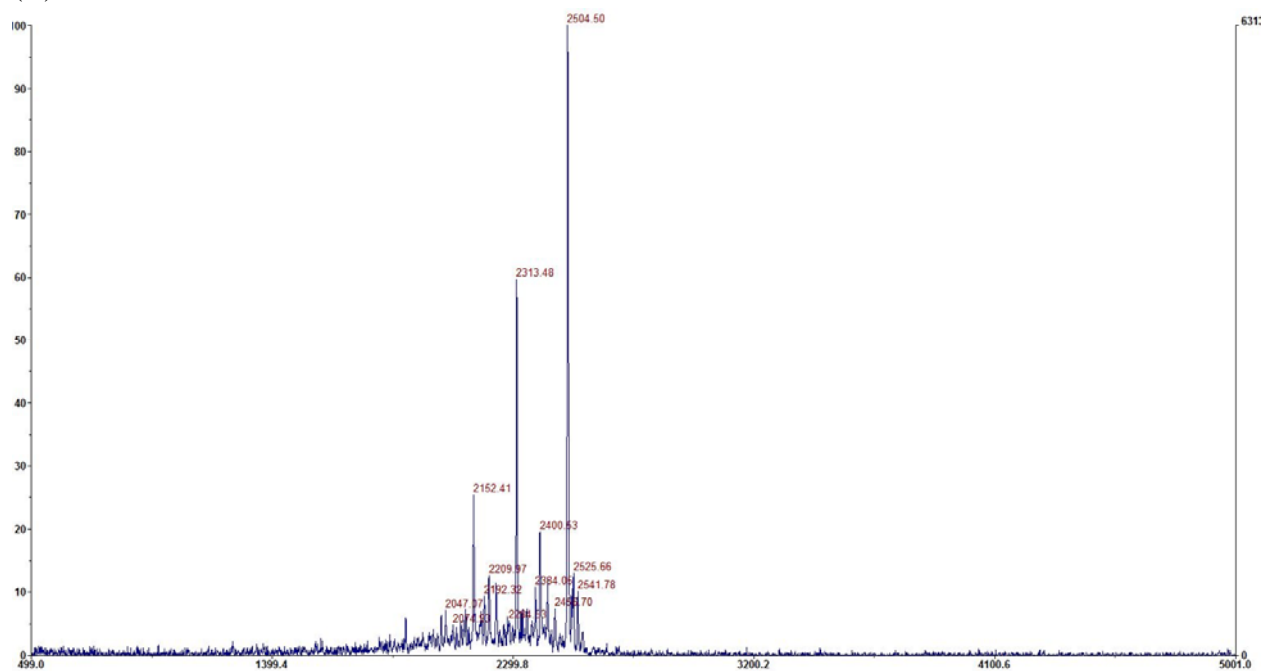

**Figure S32:** (A) Chemical structure of Compound 32, (B) MALDI-TOF spectrum of crude Compound 32.

(A)

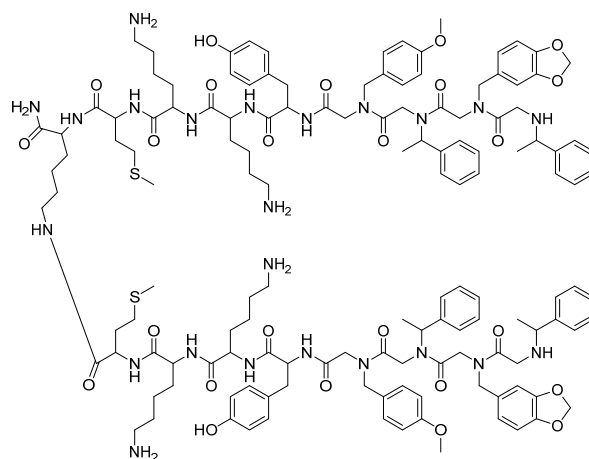

Exact Mass: 2626.32

(B)

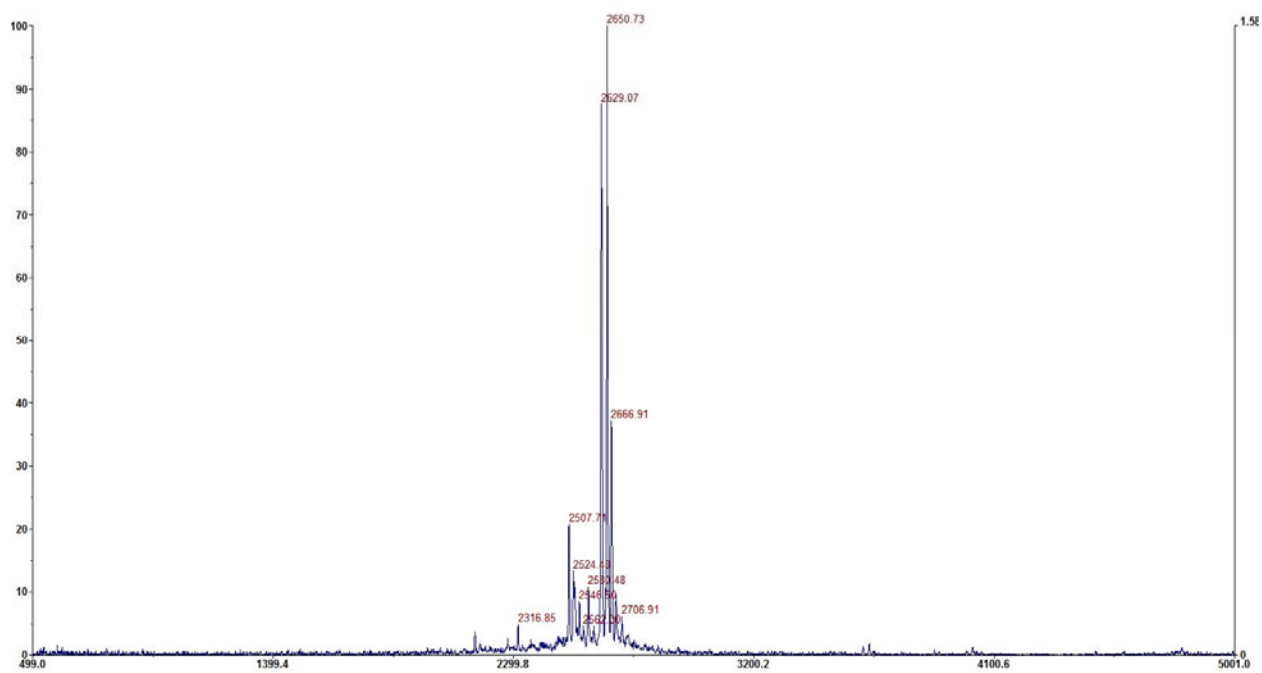

**Figure S33:** (A) Chemical structure of Compound 33, (B) MALDI-TOF spectrum of crude Compound 33.

(A)

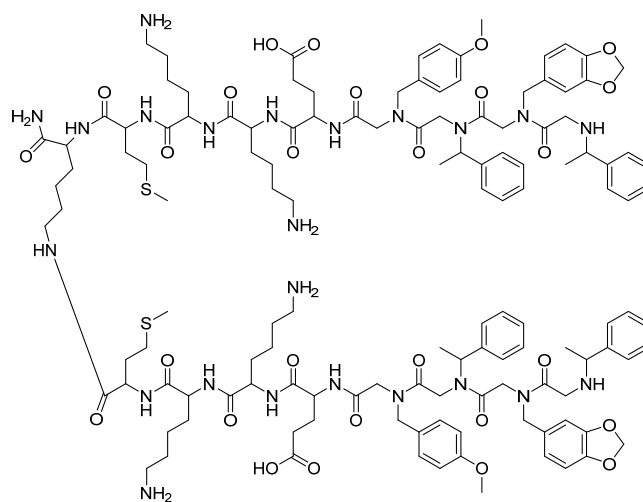

Exact Mass: 2558.28

(B)

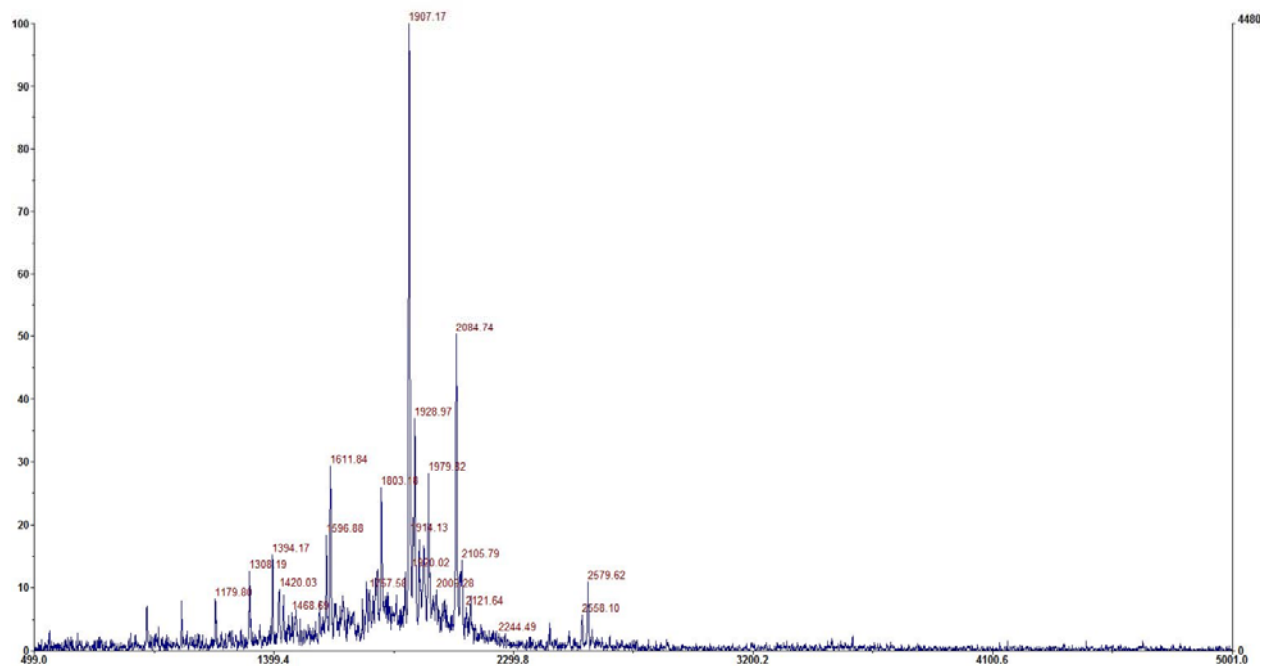

**Figure S34:** (A) Chemical structure of Compound 34, (B) MALDI-TOF spectrum of crude Compound 34.

(A)

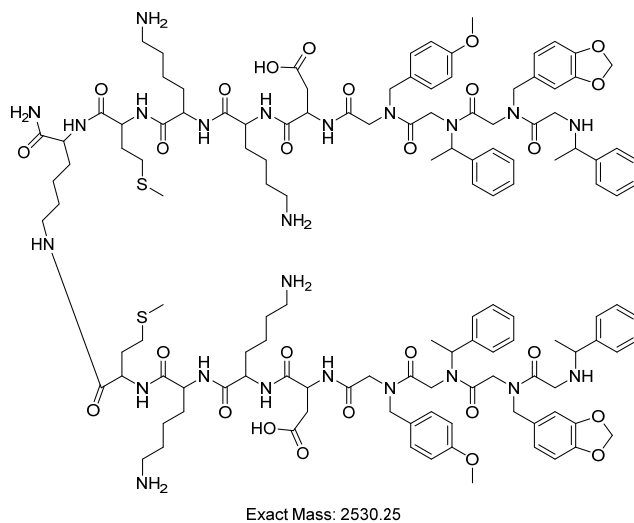

(B)

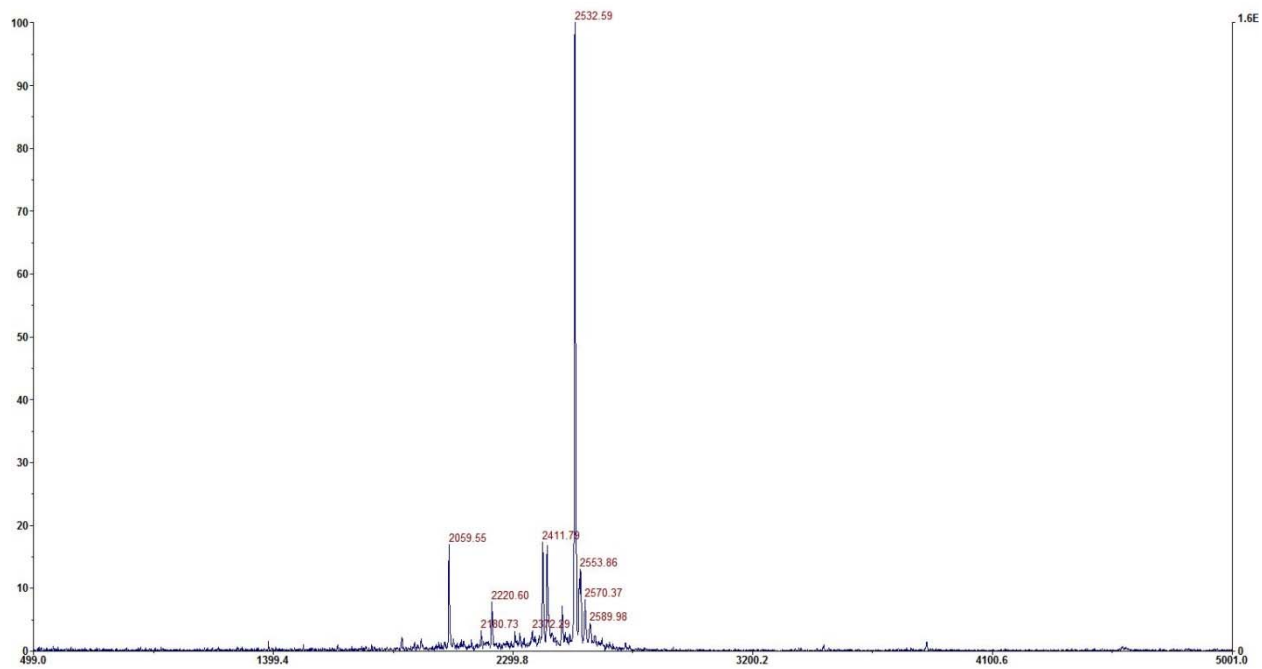

**Figure S35:** (A) Chemical structure of Compound 35, (B) MALDI-TOF spectrum of crude Compound 35.

(A)

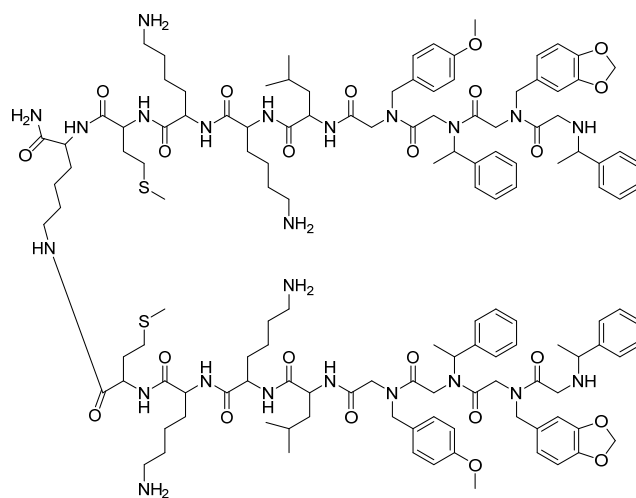

Exact Mass: 2526.36

(B)

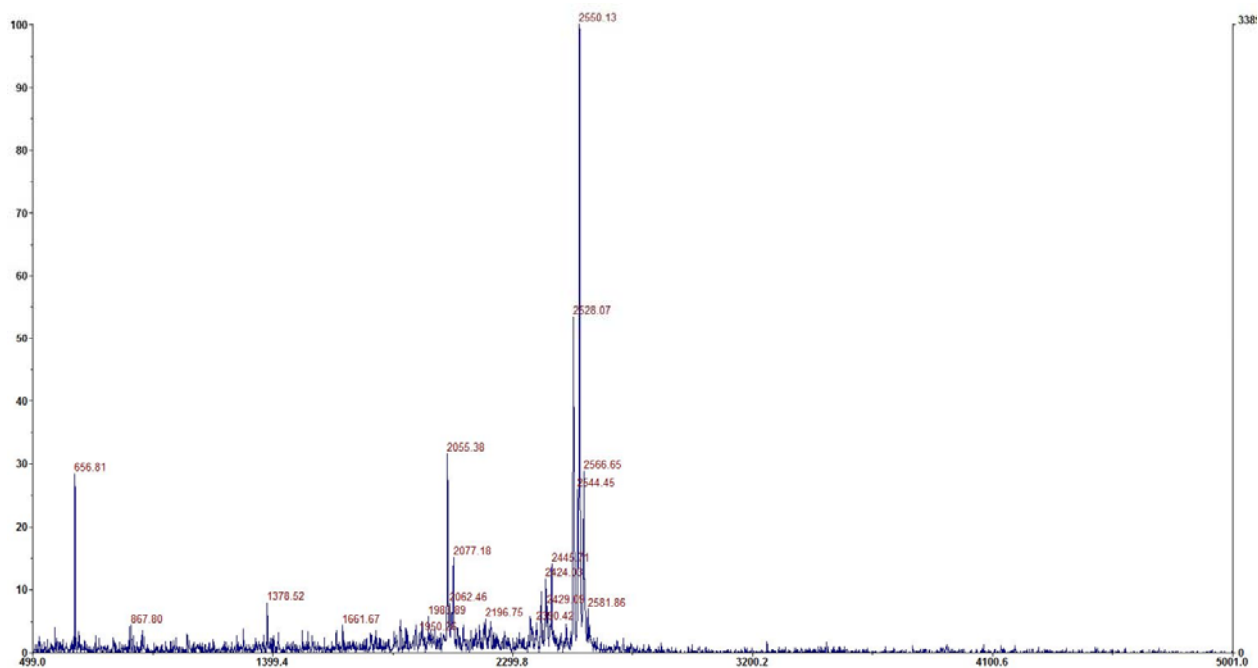

**Figure S36:** (A) Chemical structure of Compound 36, (B) MALDI-TOF spectrum of crude Compound 36.

(A)

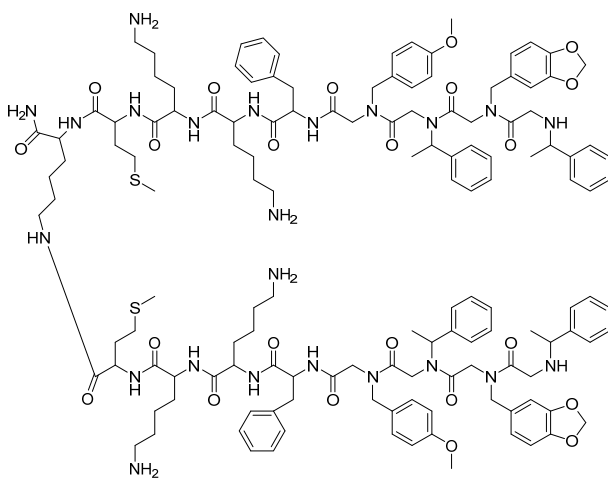

Exact Mass: 2594.33

(B)

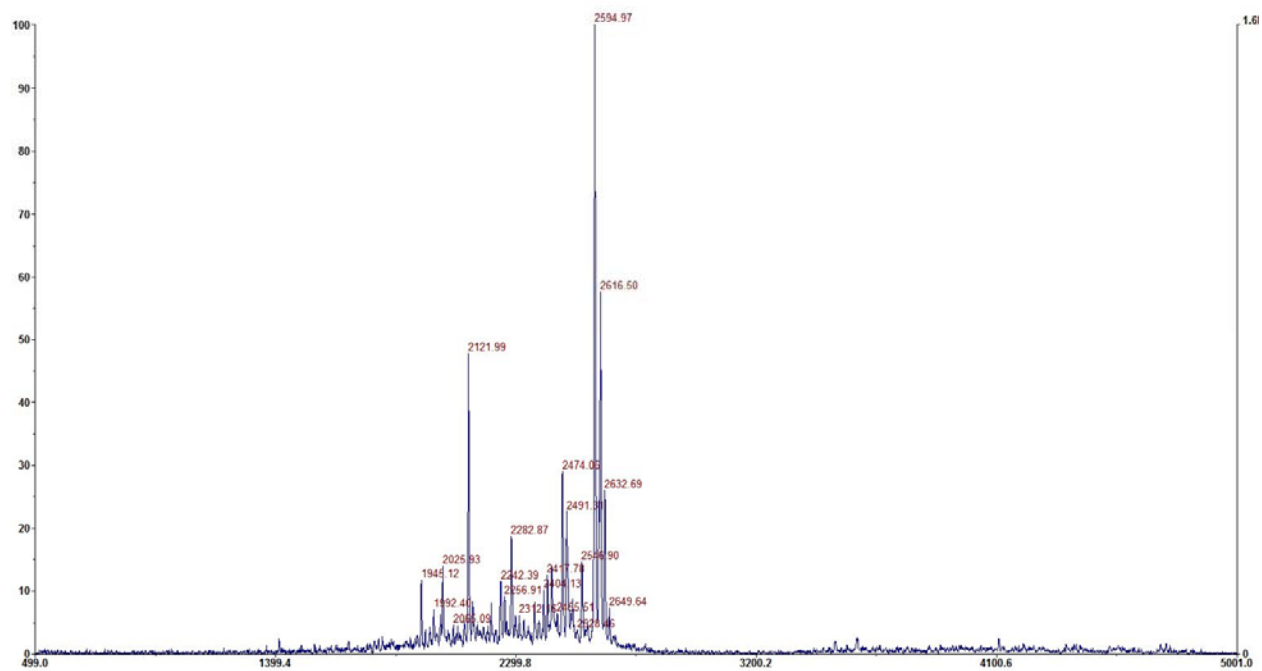

**Figure S37:** (A) Chemical structure of Compound 37, (B) MALDI-TOF spectrum of crude Compound 37.

(A)

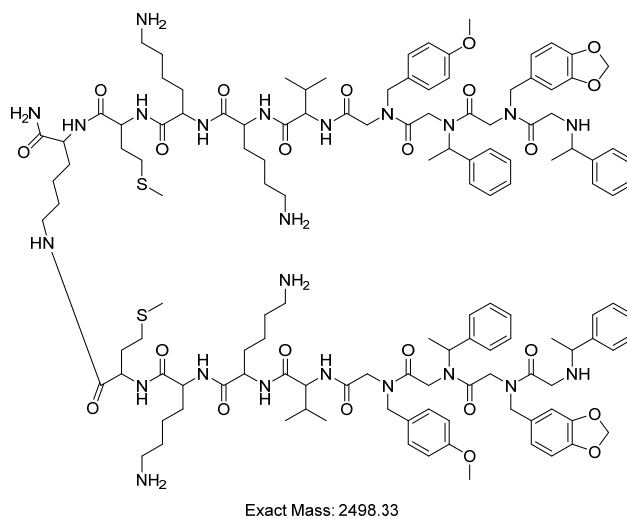

(B)

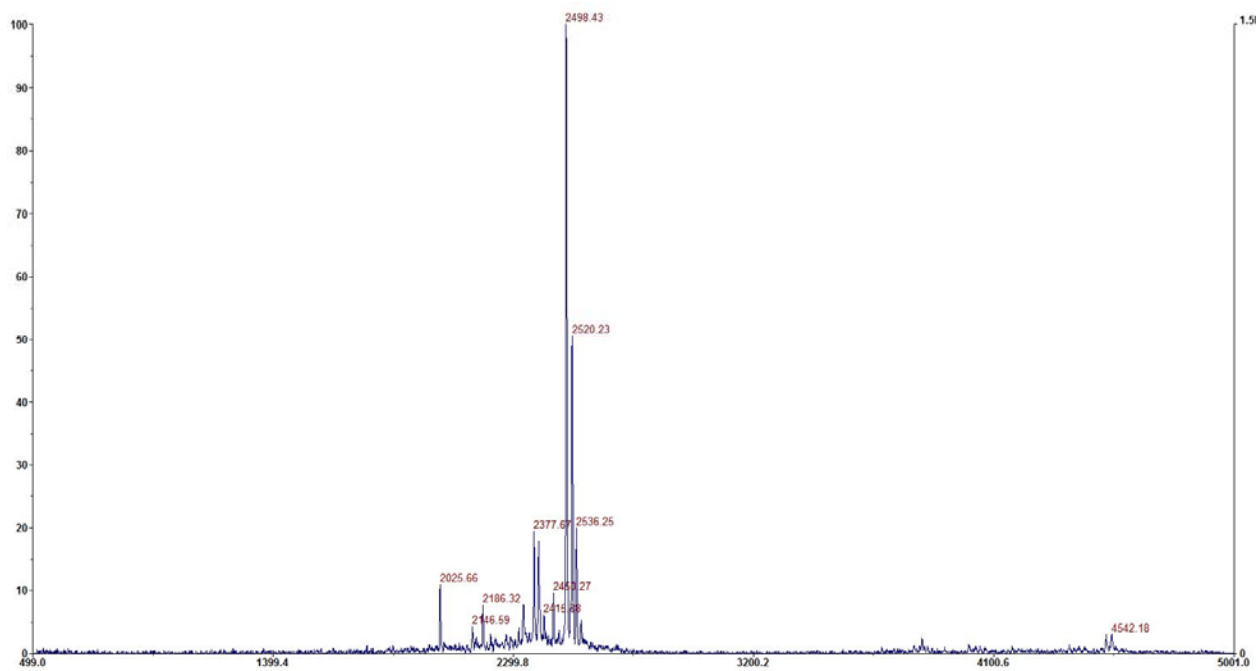

**Figure S38:** (A) Chemical structure of Compound 38, (B) MALDI-TOF spectrum of crude Compound 38.

(A)

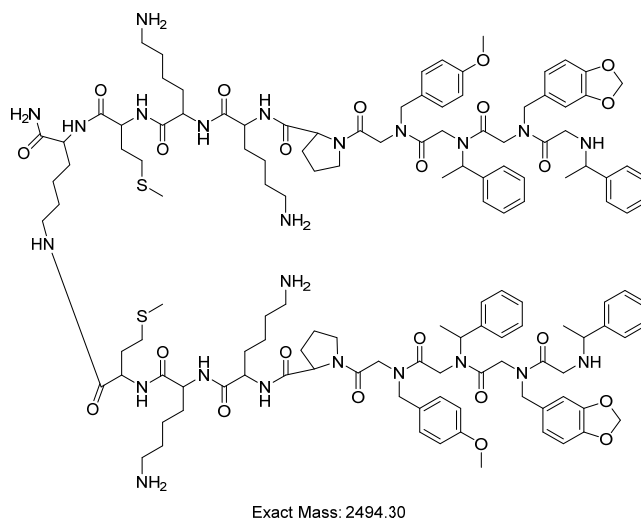

(B)

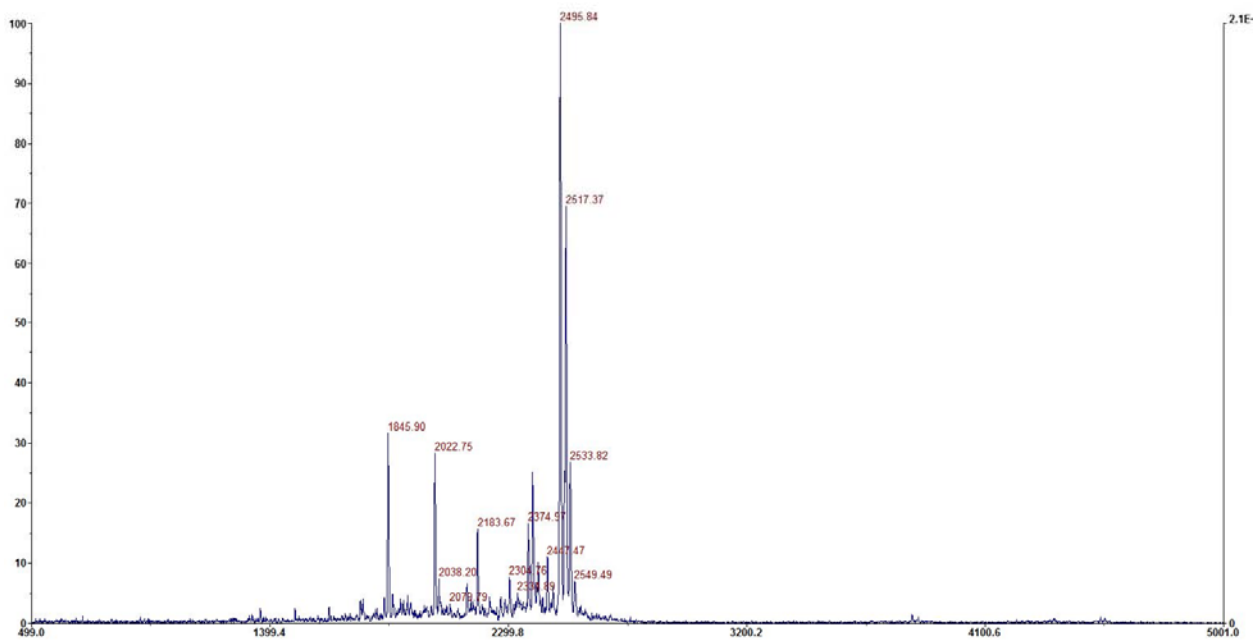

**Figure S39:** (A) Chemical structure of Compound 39, (B) MALDI-TOF spectrum of crude Compound 39.





(C)

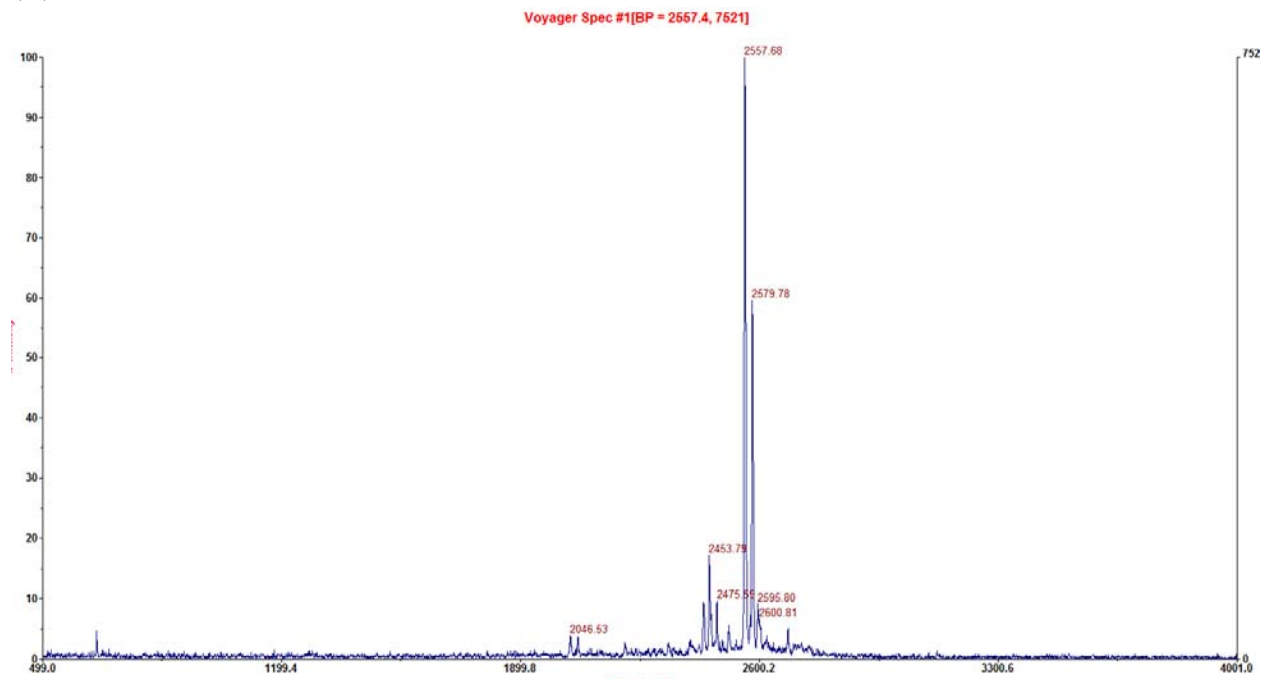

(D)

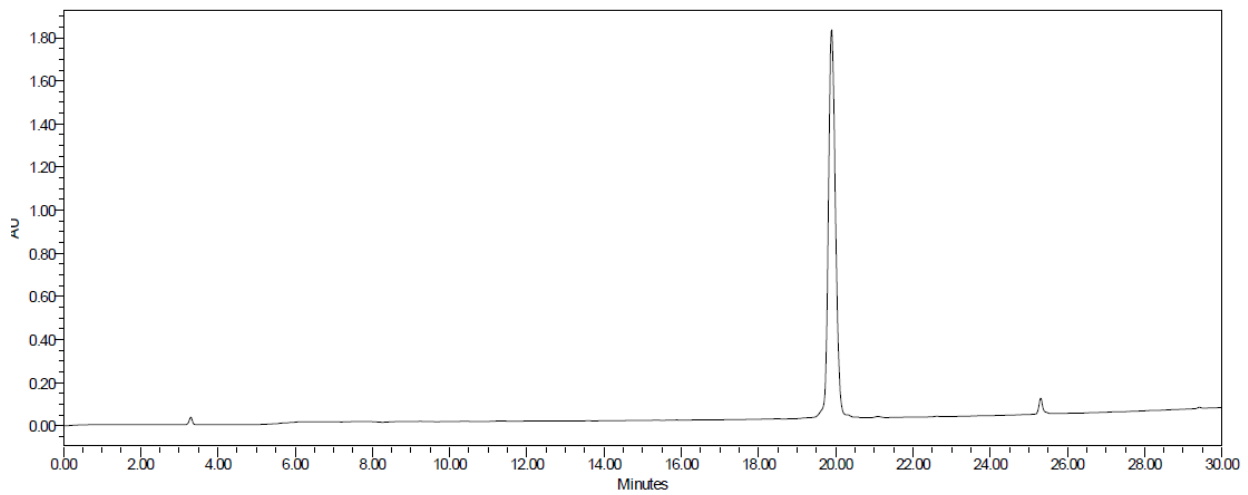

**Figure S40:** (A) Chemical structure of PPS1D1, (B) MALDI-TOF spectrum of crude PPS1D1 (C) MALDI-TOF spectrum of pure PPS1D1 (D) Analytical HPLC spectra of PPS1D1.



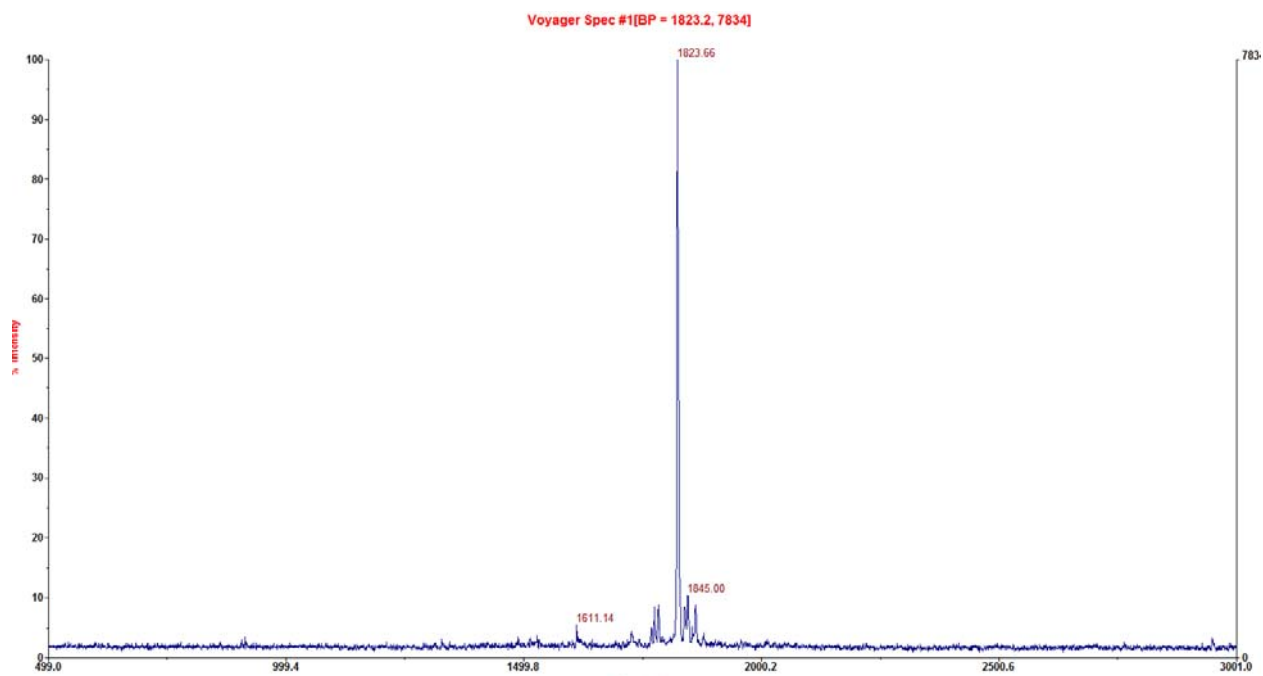

(D)

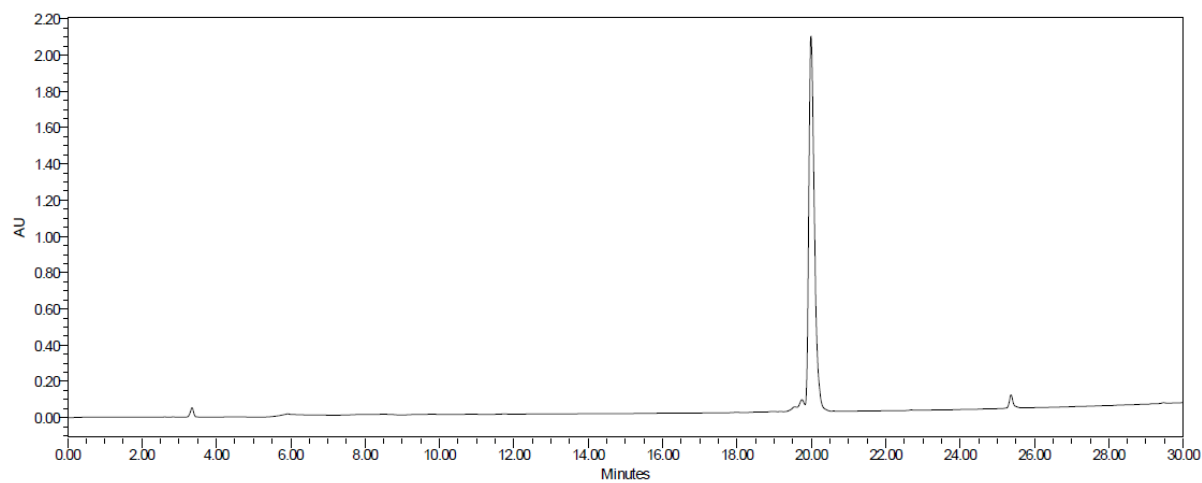

**Figure S41:** (A) Chemical structure of PC462D1, (B) MALDI-TOF spectrum of crude PC462D1/Cntrl crude (C) MALDI-TOF spectrum of pure PC462D1 (D) Analytical HPLC spectra of PC462D1.

(A)

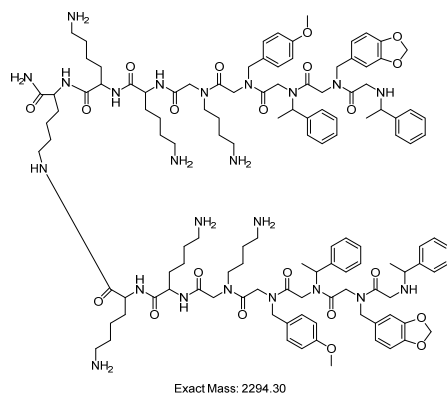

(B)

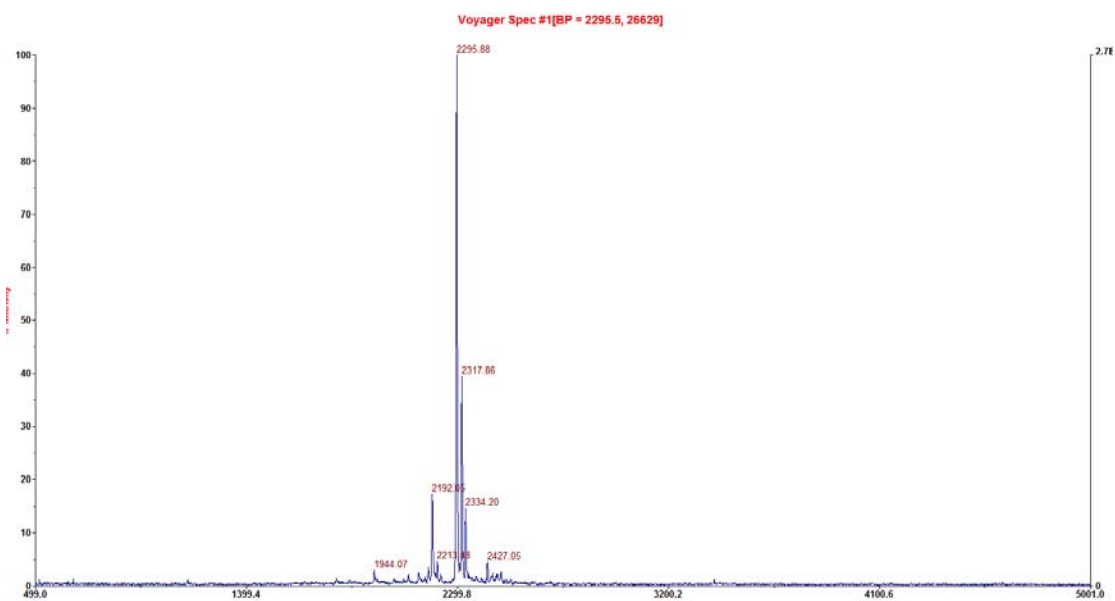

(C)

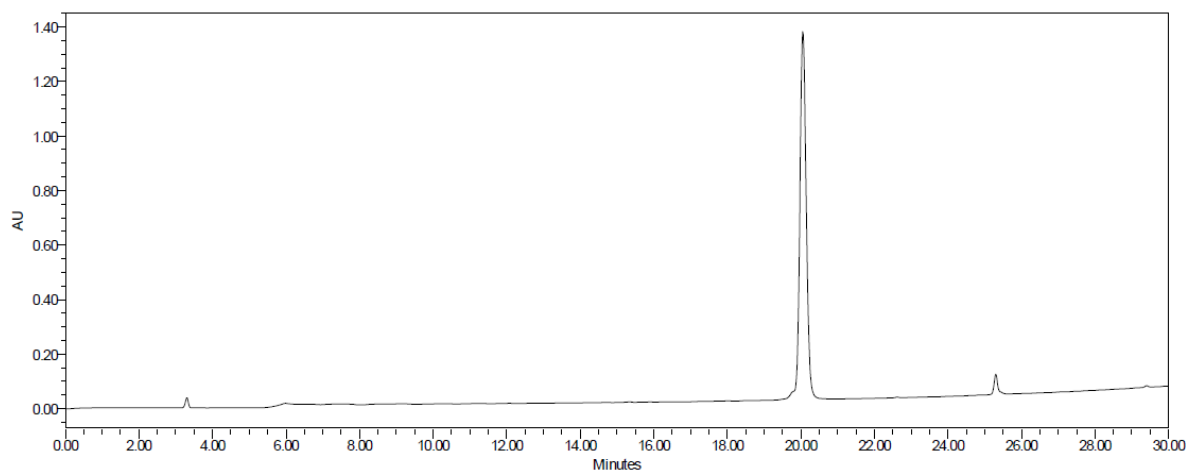

**Figure S42:** (A) Chemical structure of PPS1D1-M, (B) MALDI-TOF spectrum of PPS1D1-M (C) Analytical HPLC spectra of PPS1D1-M.

(A)

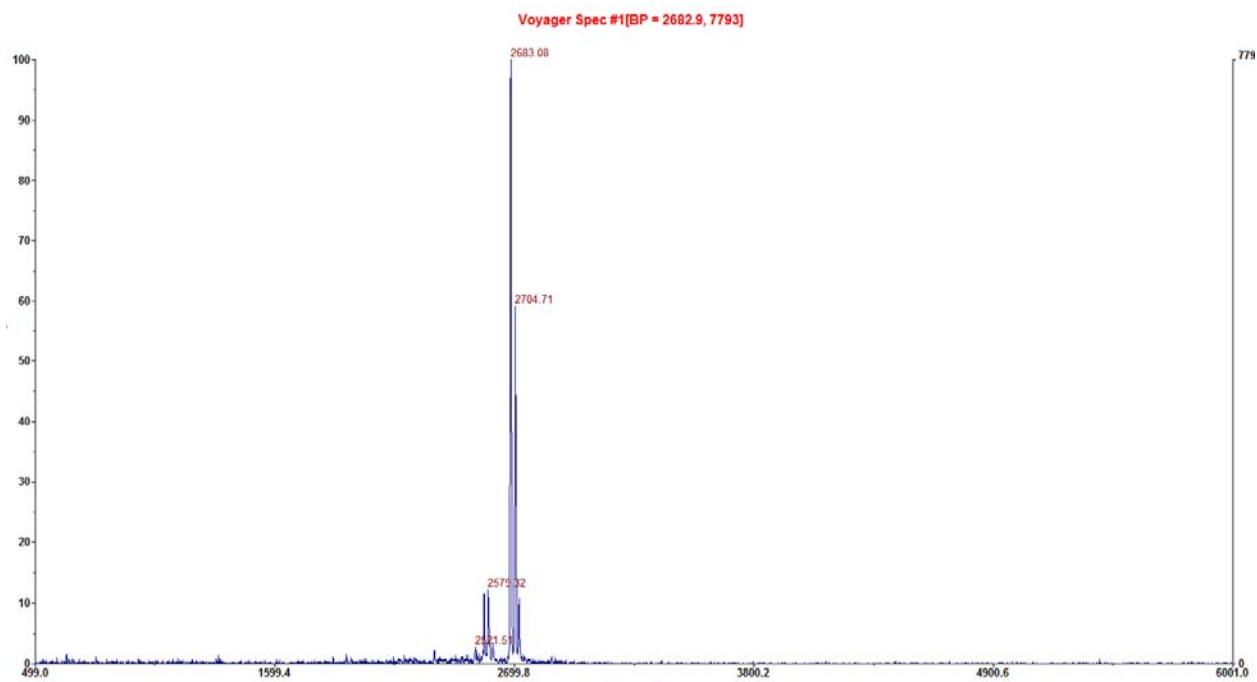

(B)

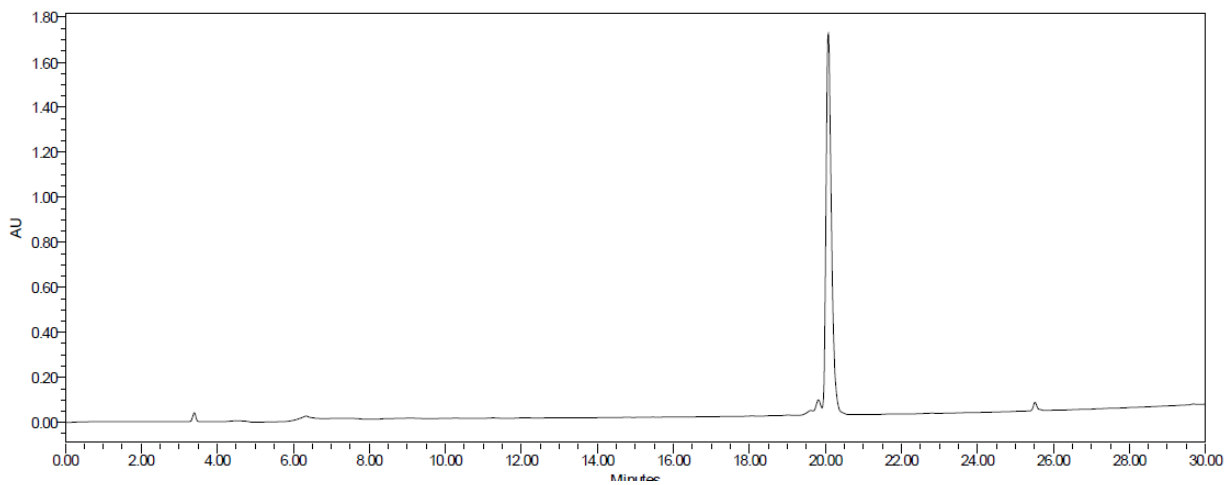

**Figure S43:** (A) MALDI-TOF spectrum of Compound 1 (B) Analytical HPLC spectra of Compound 1.

(A)

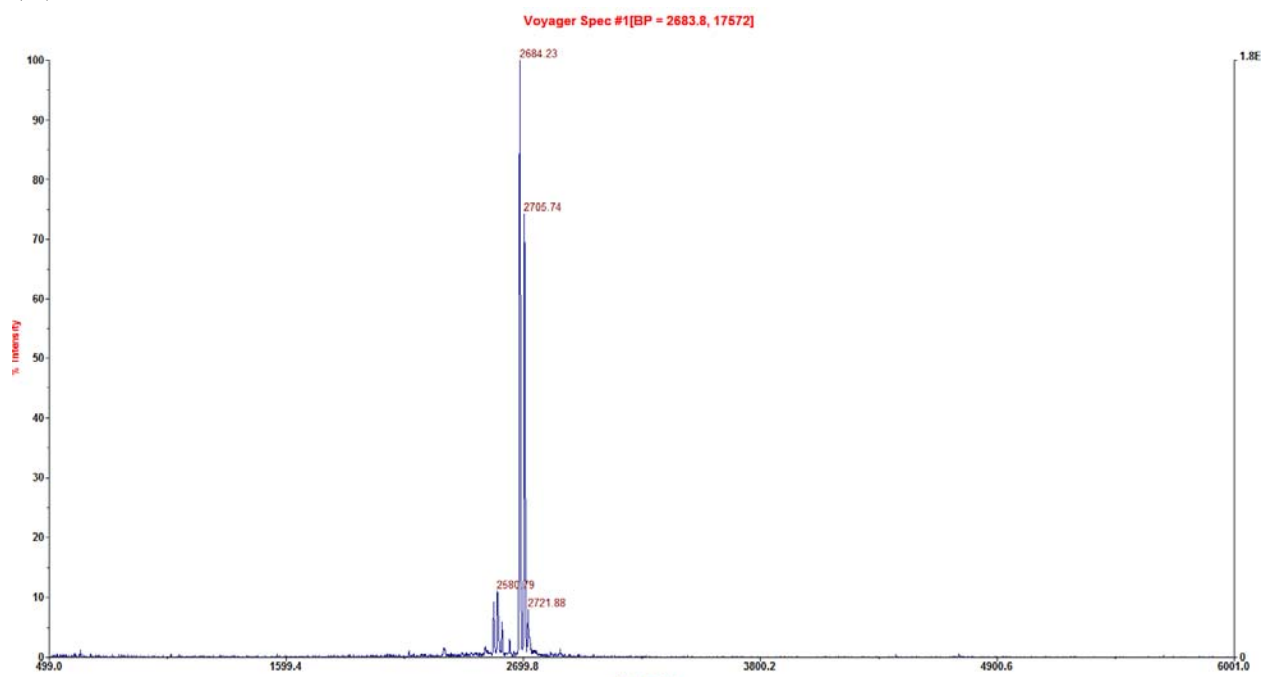

(B)

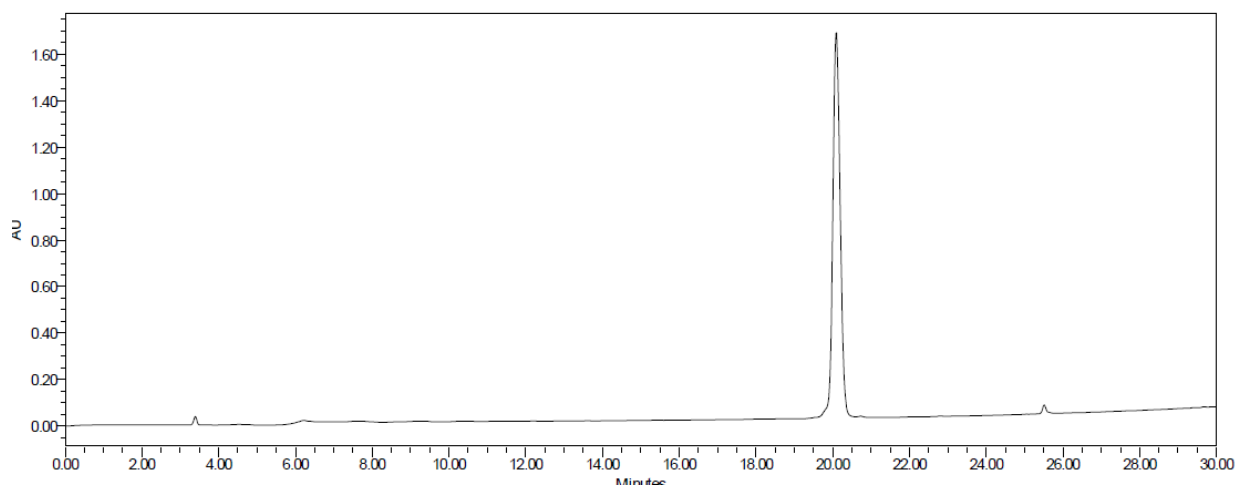

**Figure S44:** (A) MALDI-TOF spectrum of Compound 3 (B) Analytical HPLC spectra of Compound 3.

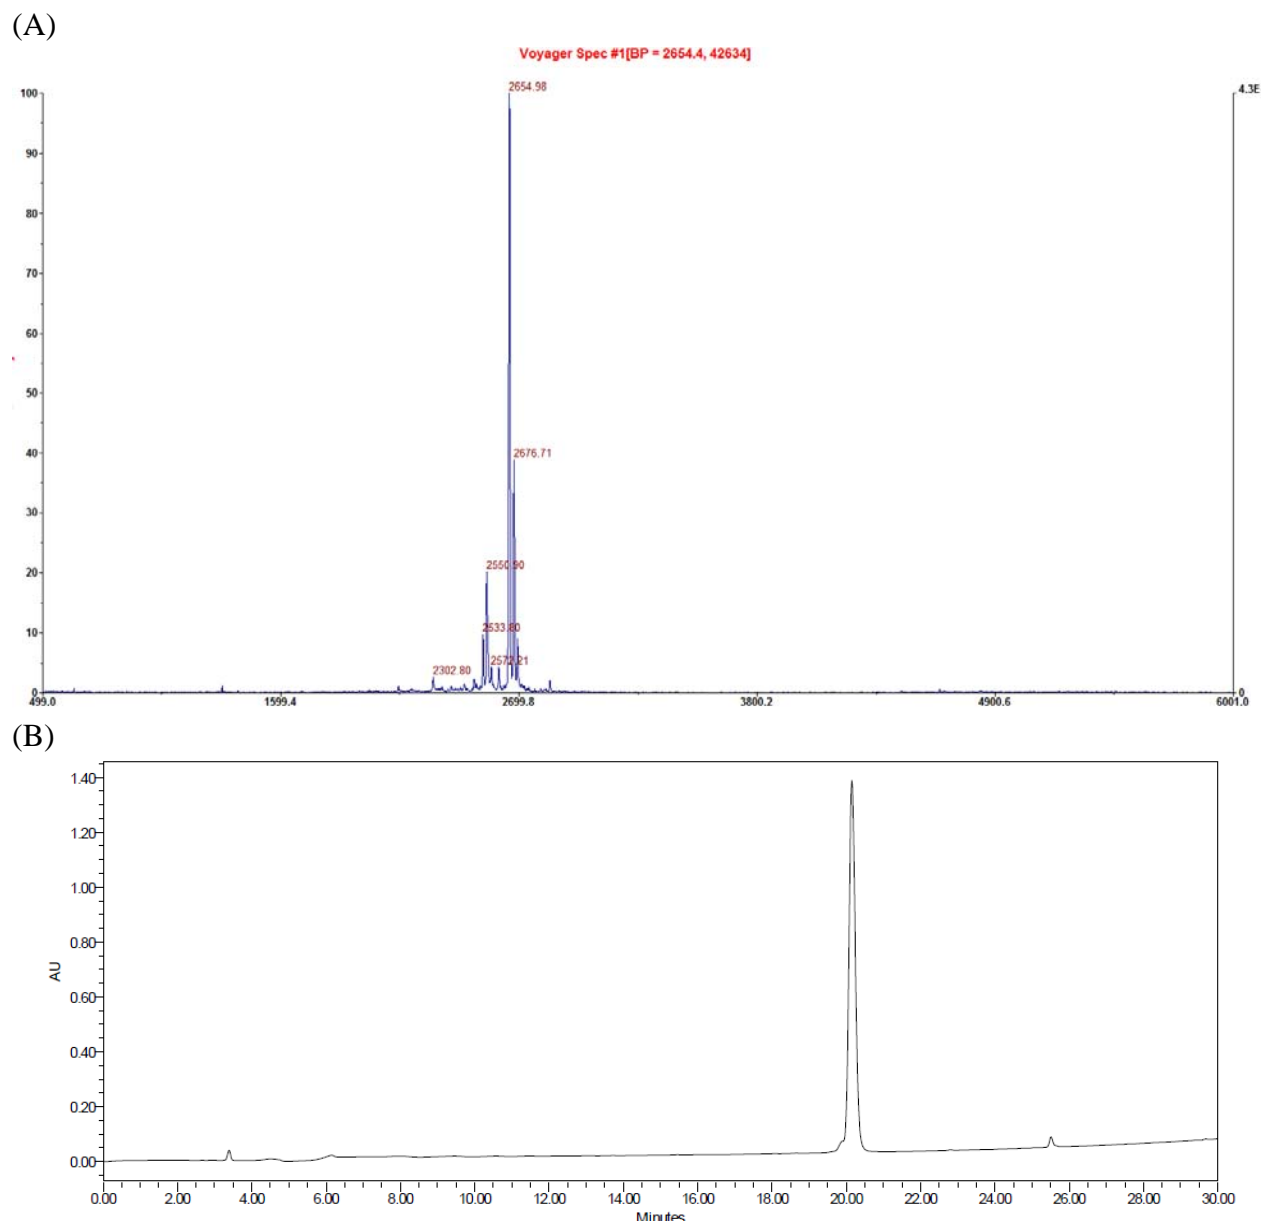

**Figure S45:** (A) MALDI-TOF spectrum of Compound 6, (B) Analytical HPLC spectra of Compound 6.



(A)

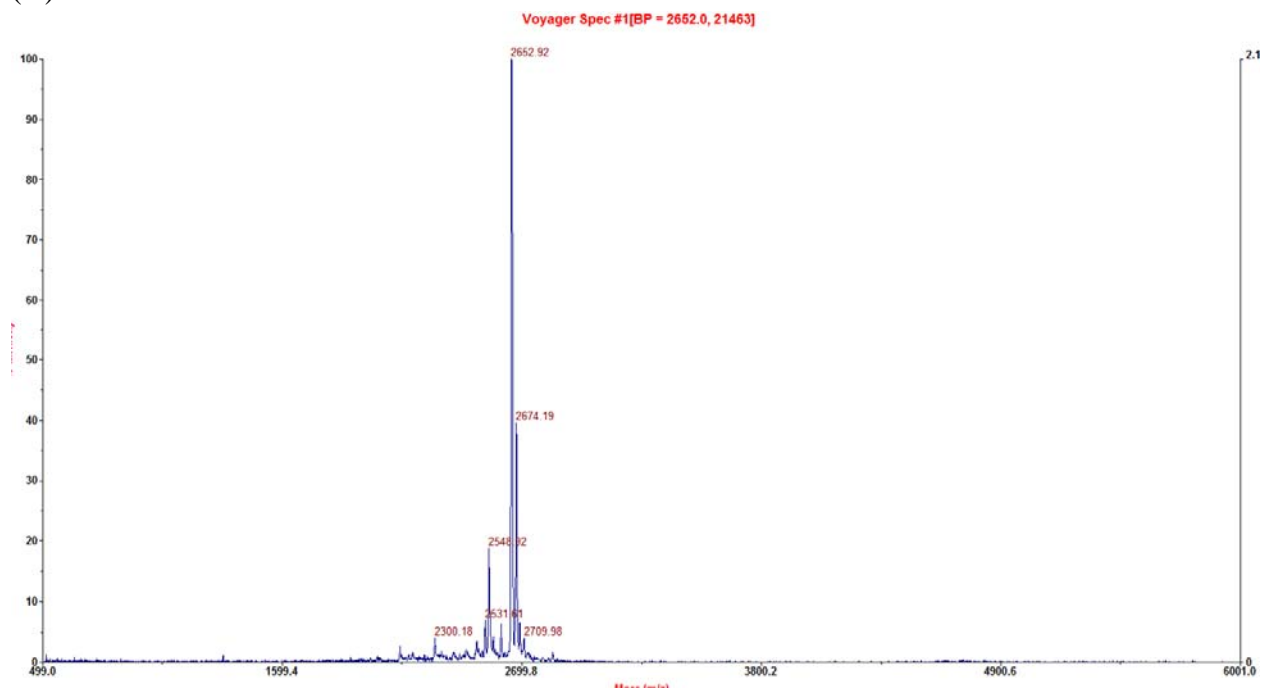

(B)

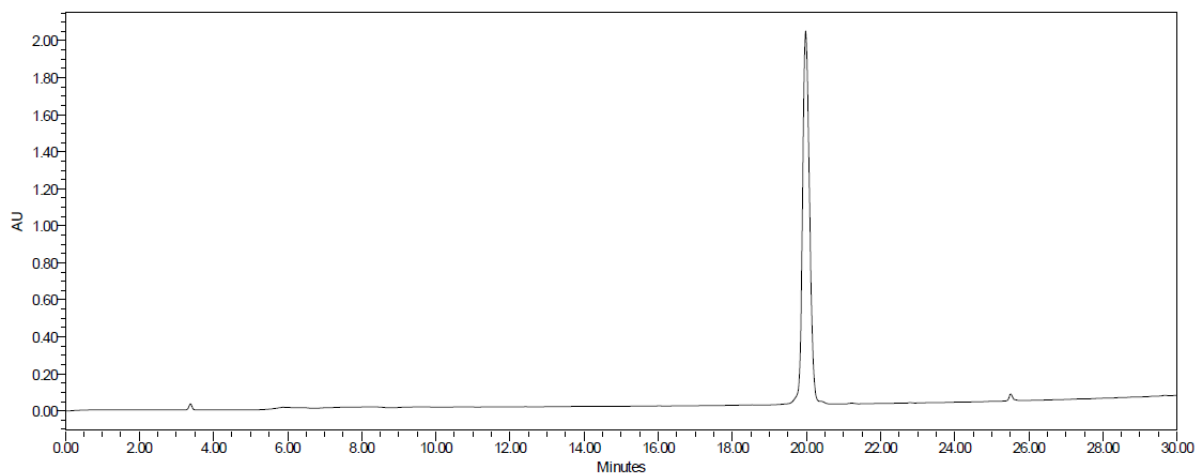

**Figure S46:** (A) MALDI-TOF spectrum of Compound 11, (B) Analytical HPLC spectra of Compound 11.

(A)

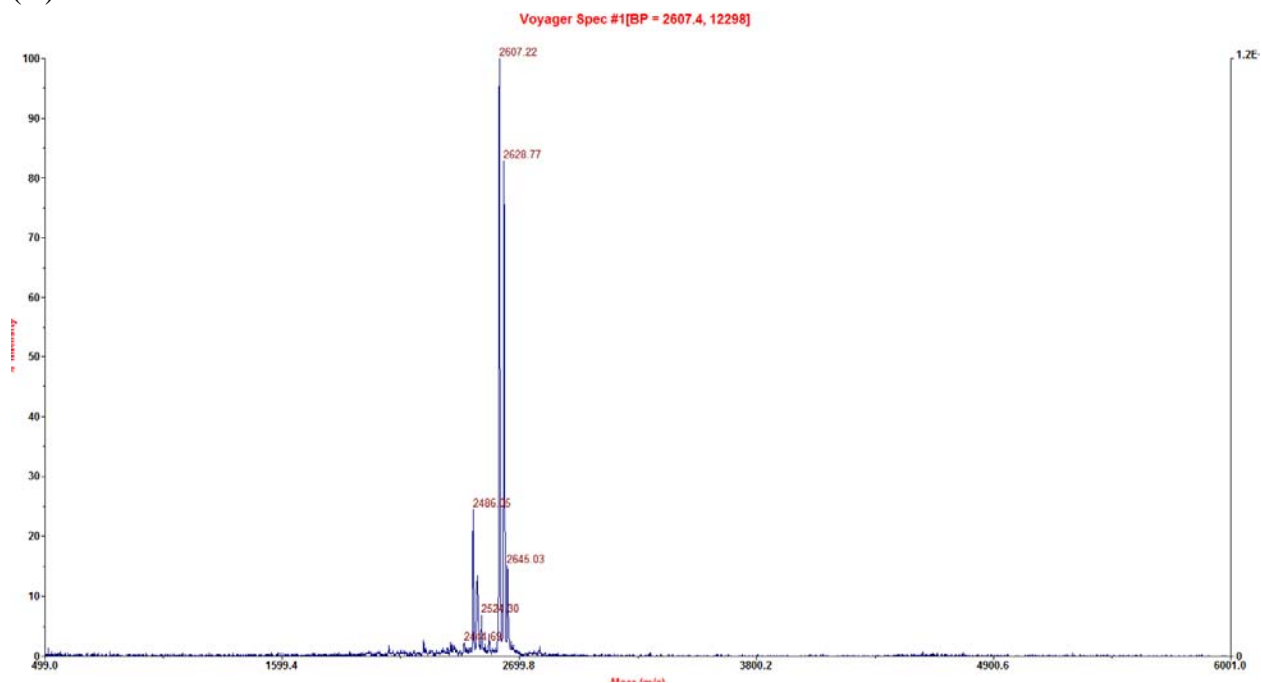

(B)

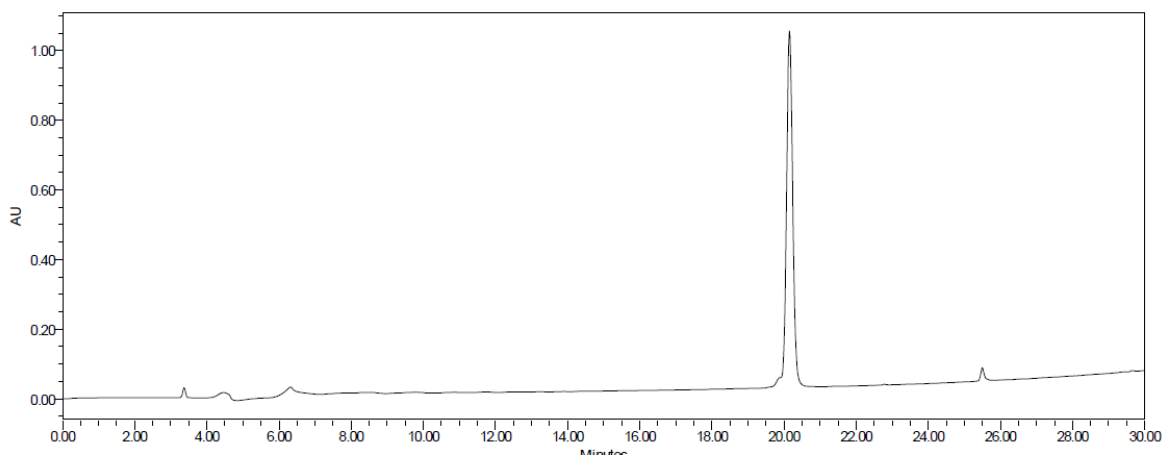

**Figure S47:** (A) MALDI-TOF spectrum of Compound 12, (B) Analytical HPLC spectra of Compound 12.

(A)

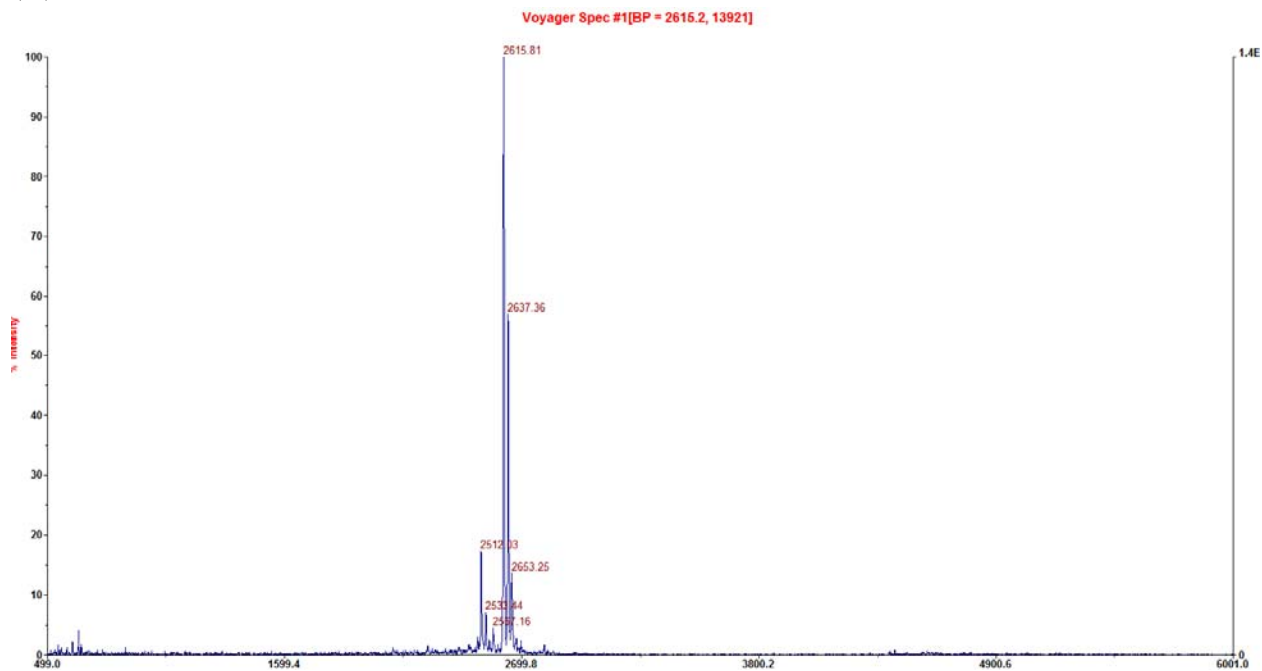

(B)

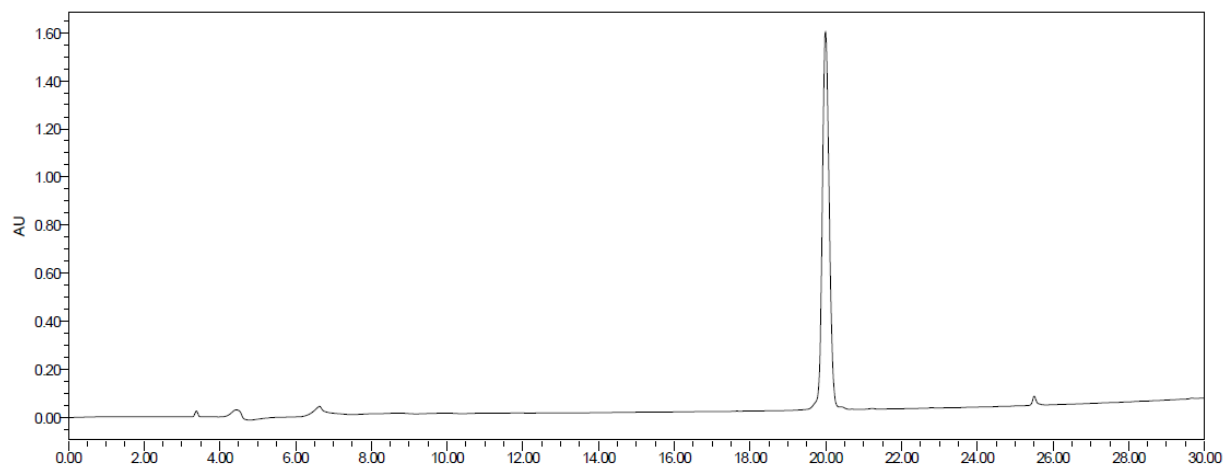

**Figure S48:** (A) MALDI-TOF spectrum of Compound 24, (B) Analytical HPLC spectra of Compound 24.

(A)

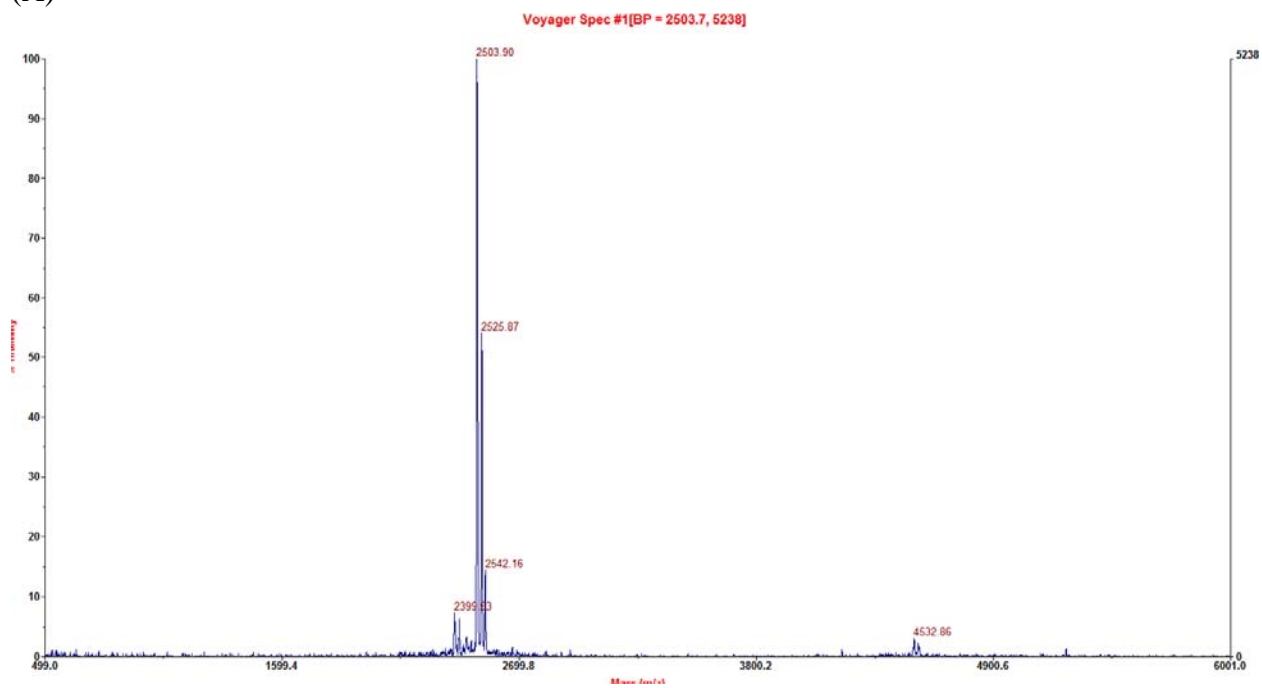

(B)

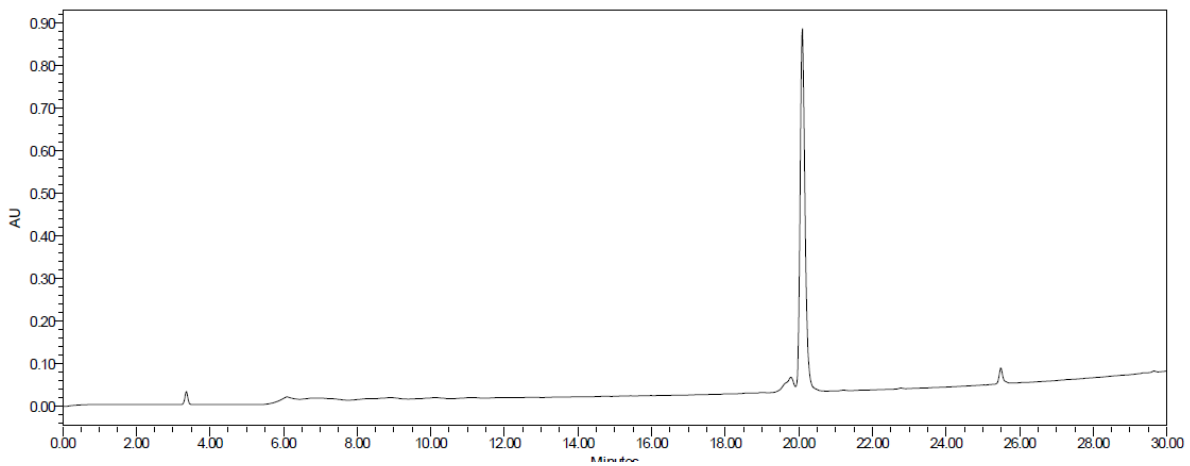

**Figure S49:** (A) MALDI-TOF spectrum of Compound 32, (B) Analytical HPLC spectra of Compound 32.

(A)

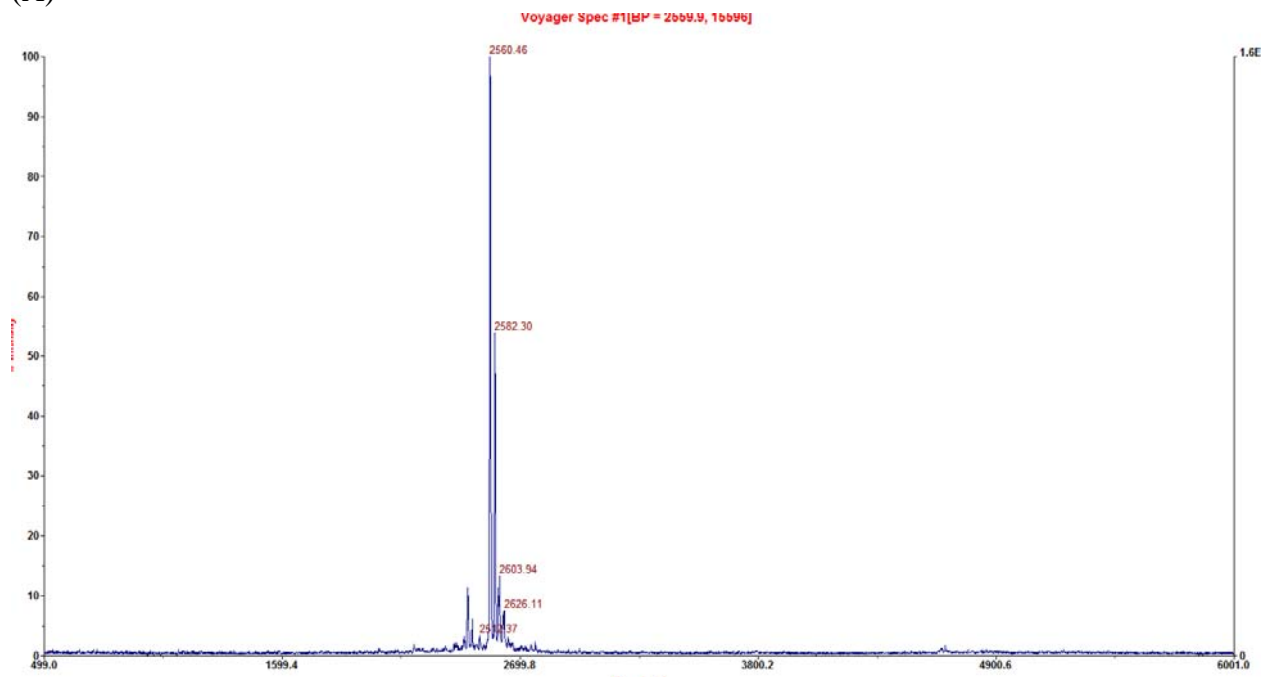

(B)

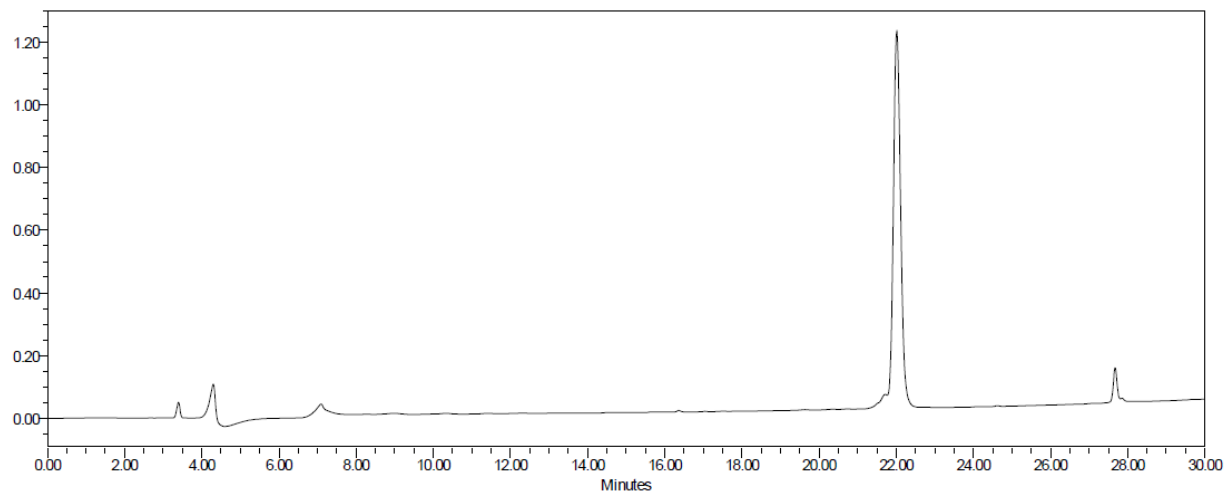

**Figure S50:** (A) MALDI-TOF spectrum of Compound 34, (B) Analytical HPLC spectra of Compound 34.

(A)

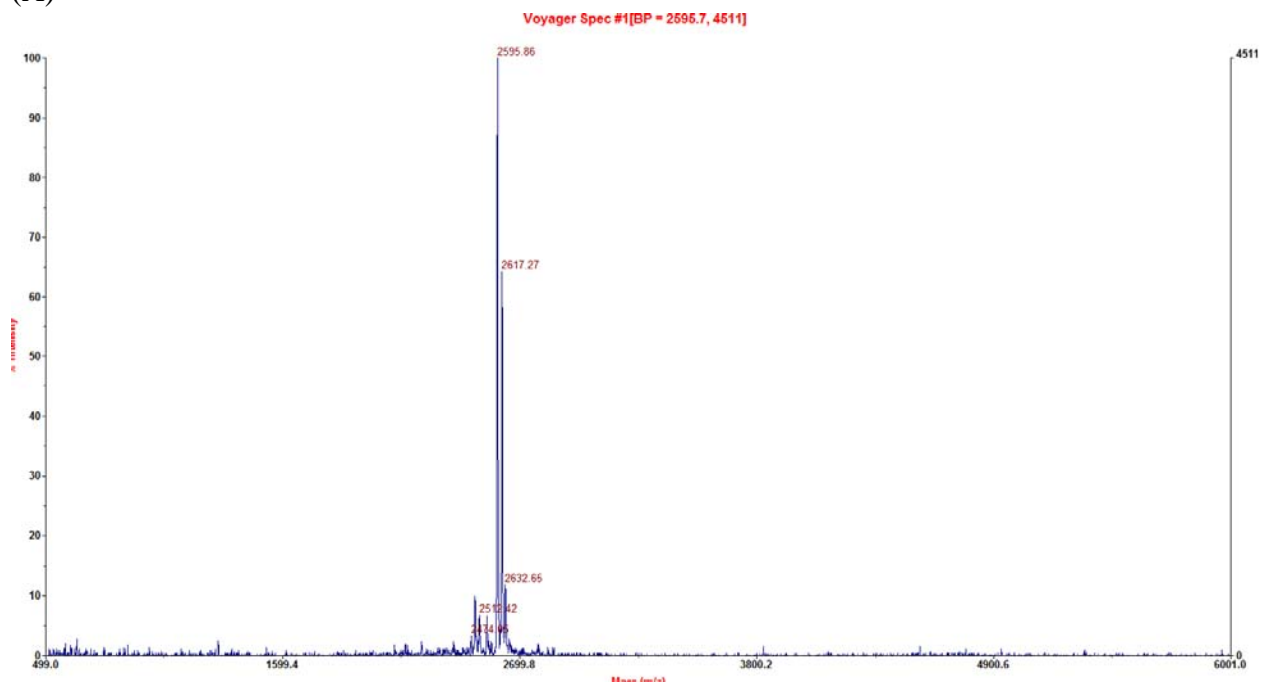

(B)

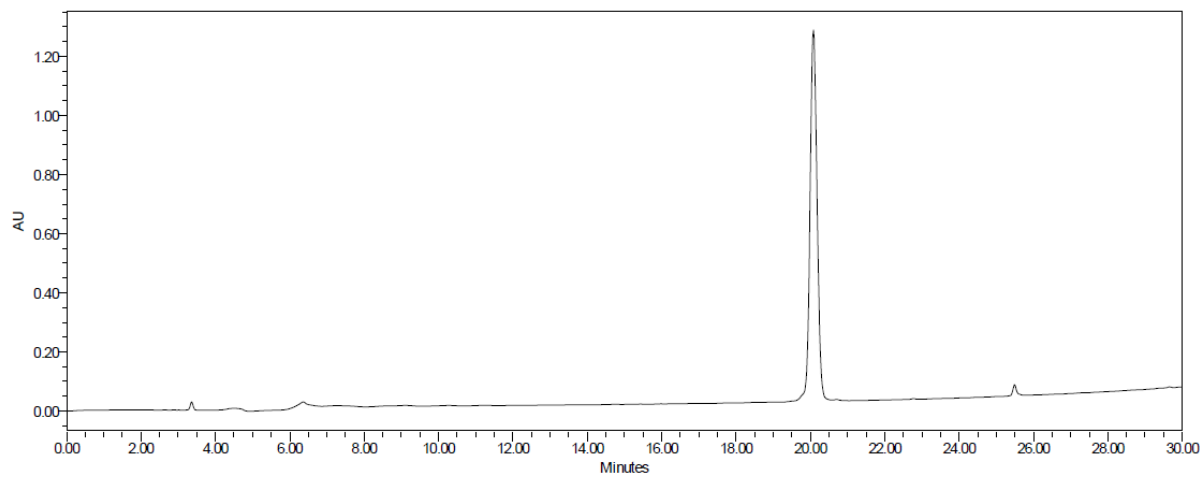

**Figure S51:** (A) MALDI-TOF spectrum of Compound 37, (B) Analytical HPLC spectra of Compound 37.
